# Supplementary material for: Effect of Dietary Grapes on Female C57BL6/J Mice Consuming a High-Fat Diet: Behavioral and Genetic Changes
Source: MDPI journal article supplement (doi:10.3390/antiox11020414), 2022-02-18
Supplement: s1 [file s1]

S2 - KEGG pathway analysis  
Enriched KEGG pathway analysis between HFDvsSTD, HF1GvsHFD and HF1GvsSTD

| HFD vs STD |                                         |          |         |            |                                                         |
|------------|-----------------------------------------|----------|---------|------------|---------------------------------------------------------|
| KEGGID     | Description                             | pvalue   | geneID  | geneName   | keggID                                                  |
| mmu04080   | Neuroactive ligand-receptor interaction | 8.98E-12 | ENSMUSG | Chrna6/Ht  | mmu:11440/mmu:15560/mmu:243764/mmu:13489/mmu:14823/mmu: |
| mmu04612   | Antigen processing and presentation     | 0.00036  | ENSMUSG | H2-Q2/Cd7  | mmu:15013/mmu:16149/mmu:14960/mmu:12504/mmu:14961       |
| mmu04020   | Calcium signaling pathway               | 0.001353 | ENSMUSG | Htr2c/Chrr | mmu:15560/mmu:243764/mmu:21336/mmu:54140/mmu:11540/mmu: |
| mmu04725   | Cholinergic synapse                     | 0.003739 | ENSMUSG | Chrna6/Gr  | mmu:11440/mmu:14706/mmu:243764/mmu:63993/mmu:213788     |
| mmu04270   | Vascular smooth muscle contraction      | 0.005032 | ENSMUSG | Avpr1a/Ad  | mmu:54140/mmu:11540/mmu:11475/mmu:18761/mmu:17540       |
| mmu05330   | Allograft rejection                     | 0.005295 | ENSMUSG | H2-Q2/H2-  | mmu:15013/mmu:14960/mmu:14961                           |
| mmu05332   | Graft-versus-host disease               | 0.006119 | ENSMUSG | H2-Q2/H2-  | mmu:15013/mmu:14960/mmu:14961                           |
| mmu05320   | Autoimmune thyroid disease              | 0.007493 | ENSMUSG | H2-Q2/H2-  | mmu:15013/mmu:14960/mmu:14961                           |
| mmu04658   | Th1 and Th2 cell differentiation        | 0.007503 | ENSMUSG | H2-Aa/Cd4  | mmu:14960/mmu:12504/mmu:18761/mmu:14961                 |
| mmu04640   | Hematopoietic cell lineage              | 0.008153 | ENSMUSG | H2-Aa/Cd4  | mmu:14960/mmu:12504/mmu:17380/mmu:14961                 |
| mmu04940   | Type I diabetes mellitus                | 0.009034 | ENSMUSG | H2-Q2/H2-  | mmu:15013/mmu:14960/mmu:14961                           |
| mmu05012   | Parkinson disease                       | 0.009323 | ENSMUSG | Th/Slc18a2 | mmu:21823/mmu:214084/mmu:13489/mmu:11540/mmu:17709      |
| mmu05310   | Asthma                                  | 0.009604 | ENSMUSG | H2-Aa/H2-  | mmu:14960/mmu:14961                                     |
| mmu05030   | Cocaine addiction                       | 0.010158 | ENSMUSG | Th/Slc18a2 | mmu:21823/mmu:214084/mmu:13489                          |
| mmu04659   | Th17 cell differentiation               | 0.012835 | ENSMUSG | H2-Aa/Cd4  | mmu:14960/mmu:12504/mmu:18761/mmu:14961                 |
| mmu05034   | Alcoholism                              | 0.014884 | ENSMUSG | Th/Gng4/S  | mmu:21823/mmu:14706/mmu:214084/mmu:13489/mmu:11540      |
| mmu05416   | Viral myocarditis                       | 0.022011 | ENSMUSG | H2-Q2/H2-  | mmu:15013/mmu:14960/mmu:14961                           |
| mmu04614   | Renin-angiotensin system                | 0.022744 | ENSMUSG | Ace/Mme    | mmu:11421/mmu:17380                                     |
| mmu04728   | Dopaminergic synapse                    | 0.031111 | ENSMUSG | Th/Gng4/S  | mmu:21823/mmu:14706/mmu:214084/mmu:13489                |
| mmu04024   | cAMP signaling pathway                  | 0.031889 | ENSMUSG | Chrm2/Drc  | mmu:243764/mmu:13489/mmu:20609/mmu:333329/mmu:11540     |

| HF1G vs HFD |                                          |          |         |            |                                                          |
|-------------|------------------------------------------|----------|---------|------------|----------------------------------------------------------|
| KEGGID      | Description                              | pvalue   | geneID  | geneName   | keggID                                                   |
| mmu04080    | Neuroactive ligand-receptor interaction  | 8.84E-05 | ENSMUSG | Gh/Chrna6  | mmu:14599/mmu:11440/mmu:243764/mmu:14823/mmu:140498/mmu: |
| mmu04725    | Cholinergic synapse                      | 0.001296 | ENSMUSG | Fos/Chrna6 | mmu:14281/mmu:11440/mmu:243764/mmu:14706                 |
| mmu04728    | Dopaminergic synapse                     | 0.002131 | ENSMUSG | Fos/Gng4/  | mmu:14281/mmu:14706/mmu:214084/mmu:13489                 |
| mmu05034    | Alcoholism                               | 0.004281 | ENSMUSG | Hist1h4j/G | mmu:319159/mmu:14706/mmu:214084/mmu:13489                |
| mmu05170    | Human immunodeficiency virus 1 infection | 0.010511 | ENSMUSG | Fos/Gng4/  | mmu:14281/mmu:14706/mmu:110557/mmu:12504                 |
| mmu04724    | Glutamatergic synapse                    | 0.012275 | ENSMUSG | Gng4/Grm   | mmu:14706/mmu:14823/mmu:329502                           |

|          |                                           |          |         |            |                                 |
|----------|-------------------------------------------|----------|---------|------------|---------------------------------|
| mmu04726 | Serotonergic synapse                      | 0.015821 | ENSMUSG | Gng4/Slc18 | mmu:14706/mmu:214084/mmu:329502 |
| mmu04926 | Relaxin signaling pathway                 | 0.017239 | ENSMUSG | Fos/Gng4/  | mmu:14281/mmu:14706/mmu:140498  |
| mmu05030 | Cocaine addiction                         | 0.018522 | ENSMUSG | Slc18a2/Di | mmu:214084/mmu:13489            |
| mmu04514 | Cell adhesion molecules (CAMs)            | 0.022332 | ENSMUSG | H2-Q6/Cd4  | mmu:110557/mmu:12504/mmu:12511  |
| mmu05031 | Amphetamine addiction                     | 0.031707 | ENSMUSG | Fos/Slc18a | mmu:14281/mmu:214084            |
| mmu04612 | Antigen processing and presentation       | 0.035444 | ENSMUSG | H2-Q6/Cd4  | mmu:110557/mmu:12504            |
| mmu05167 | Kaposi sarcoma-associated herpesvirus inf | 0.038593 | ENSMUSG | Fos/Gng4/  | mmu:14281/mmu:14706/mmu:110557  |
| mmu05168 | Herpes simplex infection                  | 0.040307 | ENSMUSG | Fos/H2-Q6  | mmu:14281/mmu:110557/mmu:170722 |
| mmu04020 | Calcium signaling pathway                 | 0.043249 | ENSMUSG | ErbB3/Chr  | mmu:13867/mmu:243764/mmu:170732 |
| mmu04024 | cAMP signaling pathway                    | 0.049453 | ENSMUSG | Fos/Chrm2  | mmu:14281/mmu:243764/mmu:13489  |

#### HF1G vs STD

| KEGGID   | Description                              | pvalue   | geneID  | geneName   | keggID                                                  |
|----------|------------------------------------------|----------|---------|------------|---------------------------------------------------------|
| mmu04612 | Antigen processing and presentation      | 6.59E-07 | ENSMUSG | Hspa5/H2-  | mmu:14828/mmu:14961/mmu:16149/mmu:110557/mmu:14960/mmu: |
| mmu05330 | Allograft rejection                      | 1.13E-05 | ENSMUSG | H2-Ab1/H2  | mmu:14961/mmu:110557/mmu:14960/mmu:15015/mmu:14969      |
| mmu05332 | Graft-versus-host disease                | 1.28E-05 | ENSMUSG | H2-Ab1/H2  | mmu:14961/mmu:110557/mmu:14960/mmu:15015/mmu:14969      |
| mmu05320 | Autoimmune thyroid disease               | 1.82E-05 | ENSMUSG | H2-Ab1/H2  | mmu:14961/mmu:110557/mmu:14960/mmu:15015/mmu:14969      |
| mmu04940 | Type I diabetes mellitus                 | 2.53E-05 | ENSMUSG | H2-Ab1/H2  | mmu:14961/mmu:110557/mmu:14960/mmu:15015/mmu:14969      |
| mmu04514 | Cell adhesion molecules (CAMs)           | 8.05E-05 | ENSMUSG | Cldn2/H2-  | mmu:12738/mmu:14961/mmu:110557/mmu:14960/mmu:15015/mmu: |
| mmu05416 | Viral myocarditis                        | 0.000114 | ENSMUSG | H2-Ab1/H2  | mmu:14961/mmu:110557/mmu:14960/mmu:15015/mmu:14969      |
| mmu05310 | Asthma                                   | 0.000218 | ENSMUSG | H2-Ab1/H2  | mmu:14961/mmu:14960/mmu:14969                           |
| mmu04145 | Phagosome                                | 0.000928 | ENSMUSG | H2-Ab1/H2  | mmu:14961/mmu:110557/mmu:14960/mmu:15015/mmu:14969/mmu: |
| mmu05168 | Herpes simplex infection                 | 0.002043 | ENSMUSG | H2-Ab1/Cd  | mmu:14961/mmu:16149/mmu:110557/mmu:14960/mmu:15015/mmu: |
| mmu05323 | Rheumatoid arthritis                     | 0.002208 | ENSMUSG | H2-Ab1/H2  | mmu:14961/mmu:14960/mmu:14969/mmu:74915                 |
| mmu04672 | Intestinal immune network for IgA produc | 0.00314  | ENSMUSG | H2-Ab1/H2  | mmu:14961/mmu:14960/mmu:14969                           |
| mmu05150 | Staphylococcus aureus infection          | 0.005338 | ENSMUSG | H2-Ab1/H2  | mmu:14961/mmu:14960/mmu:14969                           |
| mmu05322 | Systemic lupus erythematosus             | 0.005929 | ENSMUSG | Hist1h4j/H | mmu:319159/mmu:14961/mmu:14960/mmu:14969                |
| mmu05145 | Toxoplasmosis                            | 0.00785  | ENSMUSG | H2-Ab1/Ig  | mmu:14961/mmu:16145/mmu:14960/mmu:14969                 |
| mmu05321 | Inflammatory bowel disease (IBD)         | 0.007866 | ENSMUSG | H2-Ab1/H2  | mmu:14961/mmu:14960/mmu:14969                           |
| mmu05140 | Leishmaniasis                            | 0.012006 | ENSMUSG | H2-Ab1/H2  | mmu:14961/mmu:14960/mmu:14969                           |
| mmu05166 | Human T-cell leukemia virus 1 infection  | 0.012994 | ENSMUSG | Xbp1/H2-A  | mmu:22433/mmu:14961/mmu:110557/mmu:14960/mmu:15015/mmu: |
| mmu05169 | Epstein-Barr virus infection             | 0.015177 | ENSMUSG | H2-Ab1/H2  | mmu:14961/mmu:110557/mmu:14960/mmu:15015/mmu:14969      |
| mmu04918 | Thyroid hormone synthesis                | 0.016562 | ENSMUSG | Ttr/Hspa5/ | mmu:22139/mmu:14828/mmu:75512                           |
| mmu00590 | Arachidonic acid metabolism              | 0.021965 | ENSMUSG | Pla2g4e/G  | mmu:329502/mmu:75512/mmu:72054                          |
