# Supplementary material for: Effect of Dietary Grapes on Female C57BL6/J Mice Consuming a High-Fat Diet: Behavioral and Genetic Changes
Source: MDPI journal article supplement (doi:10.3390/antiox11020414), 2022-02-18
Supplement: s1 [file s1]

S1: Differentially Expressed Genes List  
(Comparison between HFD vs STD, HF1GvsHFD, HF1GvsSTD)

| HFD vs STD         |           |          |          |            |          |                                                                                 |
|--------------------|-----------|----------|----------|------------|----------|---------------------------------------------------------------------------------|
| gene_id            | gene_name | HFD_fpkm | STD_fpkm | log2FoldCh | pvalue   | gene_biot gene_description                                                      |
| ENSMUSG00000099342 | Gm18180   | 26.02039 | 2.219134 | 3.52659    | 2.54E-05 | processed_ predicted gene, 18180 [Source:MGI Symbol;Acc:MGI:5010365]            |
| ENSMUSG00000110086 | Gm45623   | 69.4047  | 10.11226 | 2.779378   | 2.78E-05 | protein_co predicted gene 45623 [Source:MGI Symbol;Acc:MGI:5791459]             |
| ENSMUSG00000005892 | Trh       | 164.2203 | 7.63788  | 4.420478   | 5.70E-05 | protein_co thyrotropin releasing hormone [Source:MGI Symbol;Acc:MGI:9882        |
| ENSMUSG00000053441 | Adamts19  | 69.94576 | 4.512242 | 3.949256   | 0.000522 | protein_co a disintegrin-like and metallopeptidase (reprolysin type) with thror |
| ENSMUSG00000035238 | Kcnk15    | 31.32811 | 3.527102 | 3.137269   | 0.000571 | protein_co potassium channel, subfamily K, member 15 [Source:MGI Symbol;/       |
| ENSMUSG00000079845 | Xlr4a     | 25.17773 | 1.573481 | 3.974585   | 0.000657 | protein_co X-linked lymphocyte-regulated 4A [Source:MGI Symbol;Acc:MGI:35       |
| ENSMUSG00000047606 | Ankrd34c  | 147.019  | 42.20922 | 1.803564   | 0.00081  | protein_co ankyrin repeat domain 34C [Source:MGI Symbol;Acc:MGI:2685617         |
| ENSMUSG00000032744 | Heyl      | 161.1945 | 55.80153 | 1.531396   | 0.001053 | protein_co hairy/enhancer-of-split related with YRPW motif-like [Source:MGI :   |
| ENSMUSG00000086096 | Gm12688   | 22.05788 | 0.368144 | 5.970172   | 0.001093 | lincRNA predicted gene 12688 [Source:MGI Symbol;Acc:MGI:3650434]                |
| ENSMUSG00000028736 | Pax7      | 49.00228 | 1.912967 | 4.672277   | 0.001272 | protein_co paired box 7 [Source:MGI Symbol;Acc:MGI:97491]                       |
| ENSMUSG00000110469 | Gm10358   | 0        | 8.479736 | -5.53183   | 0.001443 | protein_co predicted gene 10358 [Source:MGI Symbol;Acc:MGI:3708786]             |
| ENSMUSG00000050473 | Slc35d3   | 76.81208 | 20.90349 | 1.877153   | 0.001488 | protein_co solute carrier family 35, member D3 [Source:MGI Symbol;Acc:MGI:      |
| ENSMUSG00000054667 | Irs4      | 65.56378 | 8.851331 | 2.899888   | 0.002756 | protein_co insulin receptor substrate 4 [Source:MGI Symbol;Acc:MGI:1338009      |
| ENSMUSG00000030307 | Slc6a11   | 4731.989 | 1772.459 | 1.41678    | 0.00345  | protein_co solute carrier family 6 (neurotransmitter transporter, GABA), mem    |
| ENSMUSG00000000214 | Th        | 788.7003 | 181.5853 | 2.119087   | 0.003728 | protein_co tyrosine hydroxylase [Source:MGI Symbol;Acc:MGI:98735]               |
| ENSMUSG00000029219 | Slc10a4   | 149.0776 | 17.60469 | 3.08631    | 0.003928 | protein_co solute carrier family 10 (sodium/bile acid cotransporter family), me |
| ENSMUSG00000056025 | Clca3a1   | 32.02355 | 2.718566 | 3.571515   | 0.004072 | protein_co chloride channel accessory 3A1 [Source:MGI Symbol;Acc:MGI:1316       |
| ENSMUSG00000014030 | Pax5      | 35.44072 | 3.414199 | 3.395416   | 0.004701 | protein_co paired box 5 [Source:MGI Symbol;Acc:MGI:97489]                       |
| ENSMUSG00000019787 | Trdn      | 18.01783 | 0.322827 | 5.676668   | 0.004832 | protein_co triadin [Source:MGI Symbol;Acc:MGI:1924007]                          |
| ENSMUSG00000031491 | Chrna6    | 105.6233 | 2.072912 | 5.683638   | 0.00507  | protein_co cholinergic receptor, nicotinic, alpha polypeptide 6 [Source:MGI Sy  |
| ENSMUSG00000009734 | Pou6f2    | 30.30753 | 6.102383 | 2.307822   | 0.005324 | protein_co POU domain, class 6, transcription factor 2 [Source:MGI Symbol;Ac    |
| ENSMUSG00000087075 | Lbhd2     | 107.7959 | 18.21452 | 2.562743   | 0.005384 | protein_co LBH domain containing 2 [Source:MGI Symbol;Acc:MGI:2685744]          |
| ENSMUSG00000036480 | Prss56    | 36.36401 | 3.409536 | 3.427112   | 0.00578  | protein_co protease, serine 56 [Source:MGI Symbol;Acc:MGI:1916703]              |
| ENSMUSG00000038370 | Pcp4l1    | 3041.849 | 1504.322 | 1.015805   | 0.007224 | protein_co Purkinje cell protein 4-like 1 [Source:MGI Symbol;Acc:MGI:191367!    |
| ENSMUSG00000079330 | Lemd1     | 175.7175 | 72.1333  | 1.286956   | 0.007373 | protein_co LEM domain containing 1 [Source:MGI Symbol;Acc:MGI:1922403]          |
| ENSMUSG00000045518 | Onecut3   | 7.910973 | 0.368144 | 4.494076   | 0.007393 | protein_co one cut domain, family member 3 [Source:MGI Symbol;Acc:MGI:18        |
| ENSMUSG00000045534 | Kcna5     | 87.93619 | 26.805   | 1.714229   | 0.007709 | protein_co potassium voltage-gated channel, shaker-related subfamily, memb      |
| ENSMUSG00000001496 | Nkx2-1    | 26.87028 | 1.556821 | 4.088835   | 0.008079 | protein_co NK2 homeobox 1 [Source:MGI Symbol;Acc:MGI:108067]                    |
| ENSMUSG00000030098 | Grip2     | 869.3617 | 368.3439 | 1.239144   | 0.008278 | protein_co glutamate receptor interacting protein 2 [Source:MGI Symbol;Acc:!    |

|                    |             |          |          |          |          |             |                                                                      |
|--------------------|-------------|----------|----------|----------|----------|-------------|----------------------------------------------------------------------|
| ENSMUSG00000114442 | F630042J09R | 11.399   | 0.985141 | 3.538197 | 0.008575 | lincRNA     | RIKEN cDNA F630042J09 gene [Source:MGI Symbol;Acc:MGI:36421          |
| ENSMUSG00000104674 | Gm42756     | 111.6055 | 40.32585 | 1.471078 | 0.008729 | antisense   | predicted gene 42756 [Source:MGI Symbol;Acc:MGI:5662893]             |
| ENSMUSG00000055471 | Alk         | 160.5807 | 54.01225 | 1.573243 | 0.00873  | protein_co  | anaplastic lymphoma kinase [Source:MGI Symbol;Acc:MGI:103305         |
| ENSMUSG00000091705 | H2-Q2       | 38.3201  | 7.570295 | 2.345097 | 0.008791 | protein_co  | histocompatibility 2, Q region locus 2 [Source:MGI Symbol;Acc:MG     |
| ENSMUSG00000073804 | Nps         | 10.95556 | 0.690971 | 4.042177 | 0.009062 | protein_co  | neuropeptide S [Source:MGI Symbol;Acc:MGI:3642232]                   |
| ENSMUSG00000027210 | Meis2       | 1579.349 | 507.7927 | 1.636994 | 0.00944  | protein_co  | Meis homeobox 2 [Source:MGI Symbol;Acc:MGI:108564]                   |
| ENSMUSG00000024610 | Cd74        | 192.3594 | 95.36365 | 1.013553 | 0.009499 | protein_co  | CD74 antigen (invariant polypeptide of major histocompatibility co   |
| ENSMUSG00000018822 | Sfrp5       | 196.2755 | 52.47823 | 1.903935 | 0.009518 | protein_co  | secreted frizzled-related sequence protein 5 [Source:MGI Symbol;A    |
| ENSMUSG00000060284 | Sp7         | 120.4749 | 33.7659  | 1.833096 | 0.009619 | protein_co  | Sp7 transcription factor 7 [Source:MGI Symbol;Acc:MGI:2153568]       |
| ENSMUSG00000057969 | Sema3b      | 220.2039 | 101.4021 | 1.121468 | 0.009781 | protein_co  | sema domain, immunoglobulin domain (Ig), short basic domain, se      |
| ENSMUSG00000092528 | Nlrp1c-ps   | 5.411148 | 0        | 4.903701 | 0.010024 | transcribed | NLR family, pyrin domain containing 1C, pseudogene [Source:MGI !     |
| ENSMUSG00000040856 | Dlk1        | 674.5882 | 170.9219 | 1.981312 | 0.010443 | protein_co  | delta like non-canonical Notch ligand 1 [Source:MGI Symbol;Acc:M     |
| ENSMUSG00000026308 | Klhl30      | 31.52079 | 3.471513 | 3.200305 | 0.010458 | protein_co  | kelch-like 30 [Source:MGI Symbol;Acc:MGI:1918038]                    |
| ENSMUSG00000021303 | Gng4        | 1274.843 | 325.3696 | 1.969963 | 0.010484 | protein_co  | guanine nucleotide binding protein (G protein), gamma 4 [Source:M    |
| ENSMUSG00000090698 | Apold1      | 127.5426 | 49.07404 | 1.375791 | 0.010799 | protein_co  | apolipoprotein L domain containing 1 [Source:MGI Symbol;Acc:MG       |
| ENSMUSG00000054556 | Gm4876      | 51.25612 | 17.64751 | 1.533504 | 0.01171  | antisense   | predicted gene 4876 [Source:MGI Symbol;Acc:MGI:3647654]              |
| ENSMUSG00000041380 | Htr2c       | 971.5277 | 356.2678 | 1.447671 | 0.011791 | protein_co  | 5-hydroxytryptamine (serotonin) receptor 2C [Source:MGI Symbol;      |
| ENSMUSG00000063935 | Zar1        | 20.12013 | 2.790814 | 2.824535 | 0.012029 | protein_co  | zygote arrest 1 [Source:MGI Symbol;Acc:MGI:2180337]                  |
| ENSMUSG00000036594 | H2-Aa       | 74.89168 | 35.14224 | 1.095331 | 0.012459 | protein_co  | histocompatibility 2, class II antigen A, alpha [Source:MGI Symbol;A |
| ENSMUSG00000107089 | Gm43443     | 11.5804  | 1.059114 | 3.507348 | 0.012732 | TEC         | predicted gene 43443 [Source:MGI Symbol;Acc:MGI:5663580]             |
| ENSMUSG00000062393 | Dgkk        | 119.1622 | 23.91528 | 2.319705 | 0.012926 | protein_co  | diacylglycerol kinase kappa [Source:MGI Symbol;Acc:MGI:3580254       |
| ENSMUSG00000045613 | Chrm2       | 313.9887 | 118.3145 | 1.409613 | 0.01299  | protein_co  | cholinergic receptor, muscarinic 2, cardiac [Source:MGI Symbol;Acc   |
| ENSMUSG00000086794 | Gm11642     | 30.20749 | 9.954037 | 1.605893 | 0.013041 | processed_  | predicted gene 11642 [Source:MGI Symbol;Acc:MGI:3651889]             |
| ENSMUSG00000081849 | Gm15847     | 6.092234 | 0        | 5.081693 | 0.013418 | transcribed | predicted gene 15847 [Source:MGI Symbol;Acc:MGI:3783237]             |
| ENSMUSG00000025094 | Slc18a2     | 619.9745 | 174.1795 | 1.832137 | 0.013514 | protein_co  | solute carrier family 18 (vesicular monoamine), member 2 [Source:    |
| ENSMUSG00000036718 | Micall2     | 73.54502 | 35.90373 | 1.034047 | 0.013525 | protein_co  | MICAL-like 2 [Source:MGI Symbol;Acc:MGI:2444818]                     |
| ENSMUSG00000032259 | Drd2        | 297.16   | 73.76893 | 2.010815 | 0.013579 | protein_co  | dopamine receptor D2 [Source:MGI Symbol;Acc:MGI:94924]               |
| ENSMUSG00000024376 | Epb41l4a    | 146.4682 | 74.53214 | 0.97578  | 0.014084 | protein_co  | erythrocyte membrane protein band 4.1 like 4a [Source:MGI Symb       |
| ENSMUSG00000103477 | 5930409G06I | 58.96989 | 17.27082 | 1.774552 | 0.014233 | TEC         | RIKEN cDNA 5930409G06 gene [Source:MGI Symbol;Acc:MGI:1924           |
| ENSMUSG00000024211 | Grm8        | 213.7912 | 101.106  | 1.081189 | 0.014345 | protein_co  | glutamate receptor, metabotropic 8 [Source:MGI Symbol;Acc:MGI:       |
| ENSMUSG00000037568 | Vash2       | 91.43219 | 37.79322 | 1.277376 | 0.014674 | protein_co  | vasohibin 2 [Source:MGI Symbol;Acc:MGI:2444826]                      |
| ENSMUSG00000038112 | AW551984    | 356.9414 | 102.6192 | 1.799126 | 0.014772 | protein_co  | expressed sequence AW551984 [Source:MGI Symbol;Acc:MGI:214           |
| ENSMUSG00000031285 | Dcx         | 606.4526 | 170.582  | 1.829777 | 0.015773 | protein_co  | doublecortin [Source:MGI Symbol;Acc:MGI:1277171]                     |
| ENSMUSG00000050824 | Sstr5       | 12.03474 | 1.279311 | 3.224825 | 0.0159   | protein_co  | somatostatin receptor 5 [Source:MGI Symbol;Acc:MGI:894282]           |

|                     |             |          |          |          |          |                                                                                |
|---------------------|-------------|----------|----------|----------|----------|--------------------------------------------------------------------------------|
| ENSMUSG00000082361  | Btc         | 15.40989 | 2.893445 | 2.403101 | 0.016243 | protein_co betacellulin, epidermal growth factor family member [Source:MGI     |
| ENSMUSG00000068196  | Col8a1      | 148.5076 | 57.06176 | 1.382462 | 0.016473 | protein_co collagen, type VIII, alpha 1 [Source:MGI Symbol;Acc:MGI:88463]      |
| ENSMUSG00000030043  | Tacr1       | 114.3468 | 31.72294 | 1.854985 | 0.016504 | protein_co tachykinin receptor 1 [Source:MGI Symbol;Acc:MGI:98475]             |
| ENSMUSG00000038805  | Six3        | 143.0294 | 36.65867 | 1.964783 | 0.016975 | protein_co sine oculis-related homeobox 3 [Source:MGI Symbol;Acc:MGI:1027      |
| ENSMUSG00000029032  | Arhgef16    | 40.36573 | 14.51798 | 1.484578 | 0.017393 | protein_co Rho guanine nucleotide exchange factor (GEF) 16 [Source:MGI Sym     |
| ENSMUSG00000094152  | Slc6a16     | 40.52046 | 9.466602 | 2.100009 | 0.017589 | protein_co solute carrier family 6, member 16 [Source:MGI Symbol;Acc:MGI:2     |
| ENSMUSG00000020123  | Avpr1a      | 13.5391  | 2.219134 | 2.593355 | 0.017613 | protein_co arginine vasopressin receptor 1A [Source:MGI Symbol;Acc:MGI:185     |
| ENSMUSG00000051980  | Casr        | 5.813155 | 0        | 5.013069 | 0.017628 | protein_co calcium-sensing receptor [Source:MGI Symbol;Acc:MGI:1351351]        |
| ENSMUSG000000104010 | Gm37366     | 36.04075 | 13.32853 | 1.431781 | 0.017635 | TEC predicted gene, 37366 [Source:MGI Symbol;Acc:MGI:5610594]                  |
| ENSMUSG00000035694  | Caps2       | 13.82795 | 2.780543 | 2.351505 | 0.017877 | protein_co calcyphosphine 2 [Source:MGI Symbol;Acc:MGI:2441980]                |
| ENSMUSG00000081597  | Gm14506     | 1.644041 | 11.63947 | -2.81154 | 0.018547 | processed_predicted gene 14506 [Source:MGI Symbol;Acc:MGI:3705552]             |
| ENSMUSG00000025905  | Oprk1       | 95.76665 | 22.17969 | 2.117727 | 0.01865  | protein_co opioid receptor, kappa 1 [Source:MGI Symbol;Acc:MGI:97439]          |
| ENSMUSG00000031111  | Igsf1       | 251.0074 | 91.17491 | 1.461655 | 0.018676 | protein_co immunoglobulin superfamily, member 1 [Source:MGI Symbol;Acc:I       |
| ENSMUSG00000092492  | B230208B08I | 26.29859 | 4.717504 | 2.485705 | 0.018979 | processed_RIKEN cDNA B230208B08 gene [Source:MGI Symbol;Acc:MGI:2442           |
| ENSMUSG00000039323  | Igfbp2      | 1232.543 | 700.8928 | 0.814484 | 0.018982 | protein_co insulin-like growth factor binding protein 2 [Source:MGI Symbol;Ac  |
| ENSMUSG00000020169  | Best3       | 23.04736 | 2.718566 | 3.094908 | 0.018999 | protein_co bestrophin 3 [Source:MGI Symbol;Acc:MGI:3580298]                    |
| ENSMUSG00000021223  | Papln       | 51.45215 | 17.79157 | 1.537665 | 0.0192   | protein_co papilin, proteoglycan-like sulfated glycoprotein [Source:MGI Symb   |
| ENSMUSG00000079070  | Gm3985      | 21.57244 | 3.454853 | 2.664008 | 0.019315 | lincRNA predicted gene 3985 [Source:MGI Symbol;Acc:MGI:3782158]                |
| ENSMUSG00000035451  | Foxa1       | 16.56721 | 0.985141 | 4.078771 | 0.019441 | protein_co forkhead box A1 [Source:MGI Symbol;Acc:MGI:1347472]                 |
| ENSMUSG00000028717  | Tal1        | 145.7325 | 41.78082 | 1.805277 | 0.020037 | protein_co T cell acute lymphocytic leukemia 1 [Source:MGI Symbol;Acc:MGI:!    |
| ENSMUSG00000047773  | Ankfn1      | 35.14839 | 12.34978 | 1.516461 | 0.02006  | protein_co ankyrin-repeat and fibronectin type III domain containing 1 [Source |
| ENSMUSG00000036198  | Arhgap36    | 95.77994 | 20.41683 | 2.233904 | 0.020134 | protein_co Rho GTPase activating protein 36 [Source:MGI Symbol;Acc:MGI:19      |
| ENSMUSG00000025229  | Pitx3       | 14.34981 | 1.279311 | 3.481275 | 0.020401 | protein_co paired-like homeodomain transcription factor 3 [Source:MGI Symb     |
| ENSMUSG000000116755 | CT025584.1  | 15.43094 | 0.911167 | 4.037171 | 0.020442 | lincRNA novel transcript                                                       |
| ENSMUSG00000024907  | Gal         | 40.44236 | 13.68028 | 1.558852 | 0.020469 | protein_co galanin [Source:MGI Symbol;Acc:MGI:95637]                           |
| ENSMUSG00000069588  | Gm11733     | 5.648228 | 0.29417  | 4.006735 | 0.020632 | protein_co predicted gene 11733 [Source:MGI Symbol;Acc:MGI:3650737]            |
| ENSMUSG00000028270  | Gbp2        | 87.2457  | 44.48782 | 0.972465 | 0.020661 | protein_co guanylate binding protein 2 [Source:MGI Symbol;Acc:MGI:102772]      |
| ENSMUSG00000001901  | Kcnh6       | 69.2882  | 29.4969  | 1.232907 | 0.020725 | protein_co potassium voltage-gated channel, subfamily H (eag-related), memk    |
| ENSMUSG00000021506  | Pitx1       | 11.49361 | 0.645654 | 4.148122 | 0.020867 | protein_co paired-like homeodomain transcription factor 1 [Source:MGI Symb     |
| ENSMUSG00000036699  | Zcchc12     | 1980.099 | 679.8627 | 1.542305 | 0.021511 | protein_co zinc finger, CCHC domain containing 12 [Source:MGI Symbol;Acc:IV    |
| ENSMUSG00000040181  | Fmo1        | 183.5524 | 81.87586 | 1.163644 | 0.021805 | protein_co flavin containing monooxygenase 1 [Source:MGI Symbol;Acc:MGI:!      |
| ENSMUSG00000045915  | Ccdc42      | 20.66002 | 5.80355  | 1.828933 | 0.022554 | protein_co coiled-coil domain containing 42 [Source:MGI Symbol;Acc:MGI:304     |
| ENSMUSG000000112343 | Sfta3-ps    | 15.79514 | 1.676111 | 3.251206 | 0.022956 | processed_surfactant associated 3, pseudogene [Source:MGI Symbol;Acc:MGI       |
| ENSMUSG00000051354  | Samd3       | 20.10856 | 6.25033  | 1.693242 | 0.023111 | protein_co sterile alpha motif domain containing 3 [Source:MGI Symbol;Acc:IV   |

|                     |             |          |          |          |          |                                                                                                             |
|---------------------|-------------|----------|----------|----------|----------|-------------------------------------------------------------------------------------------------------------|
| ENSMUSG00000050370  | Ch25h       | 17.92675 | 4.411337 | 2.046042 | 0.023383 | protein_co cholesterol 25-hydroxylase [Source:MGI Symbol;Acc:MGI:1333869]                                   |
| ENSMUSG00000026247  | Ecel1       | 282.5478 | 82.78365 | 1.772196 | 0.023687 | protein_co endothelin converting enzyme-like 1 [Source:MGI Symbol;Acc:MGI:1333869]                          |
| ENSMUSG00000080242  | Atp6v0c-ps2 | 26.91147 | 93.14939 | -1.79157 | 0.024071 | processed_ATPase, H+ transporting, lysosomal V0 subunit C, pseudogene 2 [Source:MGI Symbol;Acc:MGI:1333869] |
| ENSMUSG00000046922  | Gpr6        | 46.27486 | 9.904057 | 2.227709 | 0.024303 | protein_co G protein-coupled receptor 6 [Source:MGI Symbol;Acc:MGI:215524]                                  |
| ENSMUSG000000107017 | Gm43196     | 6.629728 | 0.29417  | 4.231017 | 0.02432  | TEC predicted gene 43196 [Source:MGI Symbol;Acc:MGI:5663333]                                                |
| ENSMUSG000000107909 | 2610017A05I | 3.644459 | 13.44048 | -1.87804 | 0.024822 | TEC RIKEN cDNA 2610017A05 gene [Source:MGI Symbol;Acc:MGI:191905]                                           |
| ENSMUSG00000068614  | Actc1       | 5.787627 | 0.322827 | 4.0375   | 0.025133 | protein_co actin, alpha, cardiac muscle 1 [Source:MGI Symbol;Acc:MGI:879055]                                |
| ENSMUSG000000111765 | Gm10635     | 8.12767  | 0.662314 | 3.630117 | 0.025397 | lincRNA predicted gene 10635 [Source:MGI Symbol;Acc:MGI:3641740]                                            |
| ENSMUSG00000070084  | Mir486      | 1.047234 | 12.27831 | -3.57257 | 0.025441 | miRNA microRNA 486 [Source:MGI Symbol;Acc:MGI:3619423]                                                      |
| ENSMUSG00000046500  | Fam19a4     | 17.8193  | 3.290246 | 2.443472 | 0.02546  | protein_co family with sequence similarity 19, member A4 [Source:MGI Symbol;Acc:MGI:1333869]                |
| ENSMUSG00000099759  | 1700030C10f | 19.18369 | 5.186553 | 1.881987 | 0.02548  | processed_RIKEN cDNA 1700030C10 gene [Source:MGI Symbol;Acc:MGI:191605]                                     |
| ENSMUSG000000106832 | Gm42632     | 12.40395 | 2.338425 | 2.416652 | 0.025694 | TEC predicted gene 42632 [Source:MGI Symbol;Acc:MGI:5662769]                                                |
| ENSMUSG00000025316  | Banp        | 667.8149 | 1095.093 | -0.71376 | 0.025991 | protein_co BTG3 associated nuclear protein [Source:MGI Symbol;Acc:MGI:188055]                               |
| ENSMUSG00000066279  | Chrna10     | 9.34932  | 0.322827 | 4.728242 | 0.026168 | protein_co cholinergic receptor, nicotinic, alpha polypeptide 10 [Source:MGI Symbol;Acc:MGI:1333869]        |
| ENSMUSG00000023274  | Cd4         | 25.6718  | 4.767484 | 2.44616  | 0.0262   | protein_co CD4 antigen [Source:MGI Symbol;Acc:MGI:88335]                                                    |
| ENSMUSG000000112466 | Gm29674     | 46.03916 | 9.457276 | 2.281695 | 0.026212 | lincRNA predicted gene, 29674 [Source:MGI Symbol;Acc:MGI:5588833]                                           |
| ENSMUSG00000024647  | Cbln2       | 348.1619 | 159.7077 | 1.124054 | 0.026422 | protein_co cerebellin 2 precursor protein [Source:MGI Symbol;Acc:MGI:882825]                                |
| ENSMUSG00000048602  | Morc2b      | 21.47508 | 46.14339 | -1.09849 | 0.02666  | protein_co microrchidia 2B [Source:MGI Symbol;Acc:MGI:3045293]                                              |
| ENSMUSG00000031727  | Pmfbp1      | 27.24189 | 6.030134 | 2.187782 | 0.026826 | protein_co polyamine modulated factor 1 binding protein 1 [Source:MGI Symbol;Acc:MGI:1333869]               |
| ENSMUSG00000079497  | Gm13420     | 7.418548 | 0.662314 | 3.507175 | 0.0271   | protein_co predicted gene 13420 [Source:MGI Symbol;Acc:MGI:3649917]                                         |
| ENSMUSG00000090486  | BC035947    | 91.87231 | 28.38393 | 1.698763 | 0.027143 | protein_co cDNA sequence BC035947 [Source:MGI Symbol;Acc:MGI:2652858]                                       |
| ENSMUSG00000031789  | Cngb1       | 26.24223 | 8.742312 | 1.580843 | 0.027217 | protein_co cyclic nucleotide gated channel beta 1 [Source:MGI Symbol;Acc:MGI:1333869]                       |
| ENSMUSG00000086905  | Gm13716     | 53.13858 | 14.07681 | 1.914326 | 0.027255 | antisense predicted gene 13716 [Source:MGI Symbol;Acc:MGI:3650432]                                          |
| ENSMUSG00000093460  | Six3os1     | 70.87673 | 26.4543  | 1.428288 | 0.027664 | processed_SIX homeobox 3, opposite strand 1 [Source:MGI Symbol;Acc:MGI:1333869]                             |
| ENSMUSG00000031492  | Chrnb3      | 46.31351 | 10.35084 | 2.167572 | 0.028368 | protein_co cholinergic receptor, nicotinic, beta polypeptide 3 [Source:MGI Symbol;Acc:MGI:1333869]          |
| ENSMUSG00000075224  | Lrrc55      | 301.8861 | 90.55237 | 1.736306 | 0.028473 | protein_co leucine rich repeat containing 55 [Source:MGI Symbol;Acc:MGI:2652858]                            |
| ENSMUSG00000021032  | Ngb         | 202.3213 | 60.22063 | 1.748285 | 0.028521 | protein_co neuroglobin [Source:MGI Symbol;Acc:MGI:2151886]                                                  |
| ENSMUSG00000028778  | Hcrtr1      | 118.2553 | 32.0506  | 1.885267 | 0.028676 | protein_co hypocretin (orexin) receptor 1 [Source:MGI Symbol;Acc:MGI:238565]                                |
| ENSMUSG00000023945  | Slc5a7      | 63.41056 | 13.34597 | 2.256436 | 0.028733 | protein_co solute carrier family 5 (choline transporter), member 7 [Source:MGI Symbol;Acc:MGI:1333869]      |
| ENSMUSG00000020178  | Adora2a     | 152.3418 | 51.27039 | 1.570719 | 0.028828 | protein_co adenosine A2a receptor [Source:MGI Symbol;Acc:MGI:99402]                                         |
| ENSMUSG000000114452 | A530001N23  | 6.312    | 0.322827 | 4.159464 | 0.028937 | lincRNA RIKEN cDNA A530001N23 gene [Source:MGI Symbol;Acc:MGI:3045293]                                      |
| ENSMUSG00000032254  | Kif23       | 20.73005 | 6.52784  | 1.663957 | 0.028962 | protein_co kinesin family member 23 [Source:MGI Symbol;Acc:MGI:1919069]                                     |
| ENSMUSG00000020681  | Ace         | 807.7867 | 427.7503 | 0.917422 | 0.029904 | protein_co angiotensin I converting enzyme (peptidyl-dipeptidase A) 1 [Source:MGI Symbol;Acc:MGI:1333869]   |
| ENSMUSG00000035783  | Acta2       | 186.1513 | 111.5459 | 0.73865  | 0.029968 | protein_co actin, alpha 2, smooth muscle, aorta [Source:MGI Symbol;Acc:MGI:1333869]                         |

|                     |            |          |          |          |          |                                                                               |
|---------------------|------------|----------|----------|----------|----------|-------------------------------------------------------------------------------|
| ENSMUSG00000031210  | Gpr165     | 91.32978 | 32.10041 | 1.515181 | 0.030741 | protein_co G protein-coupled receptor 165 [Source:MGI Symbol;Acc:MGI:192:     |
| ENSMUSG00000029112  | Nkx1-1     | 9.758591 | 0.616997 | 3.945313 | 0.031118 | protein_co NK1 homeobox 1 [Source:MGI Symbol;Acc:MGI:109346]                  |
| ENSMUSG00000043659  | Npsr1      | 20.57725 | 3.890583 | 2.398451 | 0.031136 | protein_co neuropeptide S receptor 1 [Source:MGI Symbol;Acc:MGI:2441738]      |
| ENSMUSG00000078952  | Lncenc1    | 17.17044 | 3.352223 | 2.372122 | 0.031145 | lincRNA long non-coding RNA, embryonic stem cells expressed 1 [Source:M       |
| ENSMUSG00000021685  | Otp        | 77.04456 | 13.21468 | 2.548812 | 0.031287 | protein_co orthopedia homeobox [Source:MGI Symbol;Acc:MGI:99835]              |
| ENSMUSG00000065746  | Gm25005    | 3.686458 | 13.38145 | -1.86941 | 0.03204  | snRNA predicted gene, 25005 [Source:MGI Symbol;Acc:MGI:5454782]               |
| ENSMUSG000000106734 | Gm20559    | 52.30335 | 23.80798 | 1.139633 | 0.032558 | processed_predicted gene, 20559 [Source:MGI Symbol;Acc:MGI:5295666]           |
| ENSMUSG00000021803  | Cdhr1      | 579.0477 | 54.98451 | 3.396297 | 0.032822 | protein_co cadherin-related family member 1 [Source:MGI Symbol;Acc:MGI:2:     |
| ENSMUSG000000109917 | Gm45671    | 9.003556 | 1.104431 | 3.11188  | 0.033007 | lincRNA predicted gene 45671 [Source:MGI Symbol;Acc:MGI:5791507]              |
| ENSMUSG00000020007  | Il20ra     | 16.96267 | 3.928565 | 2.108034 | 0.033064 | protein_co interleukin 20 receptor, alpha [Source:MGI Symbol;Acc:MGI:36050    |
| ENSMUSG00000047507  | Baiap3     | 1468.08  | 486.4674 | 1.593746 | 0.033147 | protein_co BAI1-associated protein 3 [Source:MGI Symbol;Acc:MGI:2685783]      |
| ENSMUSG00000086308  | G630016G05 | 64.50563 | 18.01444 | 1.841461 | 0.033292 | lincRNA RIKEN cDNA G630016G05 gene [Source:MGI Symbol;Acc:MGI:360:            |
| ENSMUSG00000068452  | Duox2      | 9.031592 | 0.322827 | 4.678378 | 0.033353 | protein_co dual oxidase 2 [Source:MGI Symbol;Acc:MGI:3036280]                 |
| ENSMUSG00000022425  | Enpp2      | 11082.04 | 5171.314 | 1.099656 | 0.033368 | protein_co ectonucleotide pyrophosphatase/phosphodiesterase 2 [Source:MG      |
| ENSMUSG00000073805  | Fam196a    | 151.9594 | 62.51348 | 1.280168 | 0.033645 | protein_co family with sequence similarity 196, member A [Source:MGI Symb     |
| ENSMUSG00000026778  | Prkcq      | 258.8815 | 143.7761 | 0.848622 | 0.033847 | protein_co protein kinase C, theta [Source:MGI Symbol;Acc:MGI:97601]          |
| ENSMUSG000000103200 | Gm37328    | 5.197801 | 17.40625 | -1.73687 | 0.034012 | sense_intr predicted gene, 37328 [Source:MGI Symbol;Acc:MGI:5610556]          |
| ENSMUSG00000021647  | Cartpt     | 209.3507 | 47.20655 | 2.148276 | 0.034015 | protein_co CART prepropeptide [Source:MGI Symbol;Acc:MGI:1351330]             |
| ENSMUSG00000049134  | Nrap       | 26.09977 | 9.030873 | 1.542715 | 0.034037 | protein_co nebulin-related anchoring protein [Source:MGI Symbol;Acc:MGI:10    |
| ENSMUSG00000031130  | Brs3       | 4.189216 | 0        | 4.541845 | 0.034053 | protein_co bombesin-like receptor 3 [Source:MGI Symbol;Acc:MGI:1100501]       |
| ENSMUSG000000100548 | Gm29585    | 0.321078 | 5.503771 | -3.93192 | 0.034108 | antisense predicted gene 29585 [Source:MGI Symbol;Acc:MGI:5580291]            |
| ENSMUSG00000028640  | Tfap2c     | 8.260087 | 0.322827 | 4.549117 | 0.034147 | protein_co transcription factor AP-2, gamma [Source:MGI Symbol;Acc:MGI:10     |
| ENSMUSG00000021611  | Tert       | 36.11776 | 13.54484 | 1.423618 | 0.034168 | protein_co telomerase reverse transcriptase [Source:MGI Symbol;Acc:MGI:120    |
| ENSMUSG00000000392  | Fap        | 47.73322 | 17.86554 | 1.42333  | 0.03427  | protein_co fibroblast activation protein [Source:MGI Symbol;Acc:MGI:109608]   |
| ENSMUSG000000101578 | Vmn1r206   | 14.38762 | 1.104431 | 3.761989 | 0.034356 | protein_co vomeronasal 1 receptor 206 [Source:MGI Symbol;Acc:MGI:215966       |
| ENSMUSG00000062200  | Vmn2r7     | 0        | 5.59268  | -4.92497 | 0.034775 | protein_co vomeronasal 2, receptor 7 [Source:MGI Symbol;Acc:MGI:2441693]      |
| ENSMUSG00000017817  | Jph2       | 35.16962 | 9.570445 | 1.866883 | 0.035027 | protein_co junctophilin 2 [Source:MGI Symbol;Acc:MGI:1891496]                 |
| ENSMUSG00000024565  | Sall3      | 172.9548 | 54.07706 | 1.676289 | 0.035041 | protein_co spalt like transcription factor 3 [Source:MGI Symbol;Acc:MGI:1092: |
| ENSMUSG00000036867  | Smad6      | 85.08011 | 45.75859 | 0.89859  | 0.035048 | protein_co SMAD family member 6 [Source:MGI Symbol;Acc:MGI:1336883]           |
| ENSMUSG000000108010 | Gm38708    | 12.41094 | 2.441056 | 2.381458 | 0.035387 | lincRNA predicted gene, 38708 [Source:MGI Symbol;Acc:MGI:5621593]             |
| ENSMUSG00000099907  | Gm10421    | 17.21886 | 3.613073 | 2.255523 | 0.035408 | processed_predicted gene 10421 [Source:MGI Symbol;Acc:MGI:3642601]            |
| ENSMUSG00000097385  | Gm26814    | 13.03148 | 35.44123 | -1.43954 | 0.03548  | TEC predicted gene, 26814 [Source:MGI Symbol;Acc:MGI:5477308]                 |
| ENSMUSG00000060985  | Tdrd5      | 65.71254 | 31.75497 | 1.046932 | 0.036028 | protein_co tudor domain containing 5 [Source:MGI Symbol;Acc:MGI:2684949]      |
| ENSMUSG00000058152  | Chsy3      | 65.80207 | 16.68342 | 1.978472 | 0.036408 | protein_co chondroitin sulfate synthase 3 [Source:MGI Symbol;Acc:MGI:19261    |

|                     |            |          |          |          |          |                                                                                 |
|---------------------|------------|----------|----------|----------|----------|---------------------------------------------------------------------------------|
| ENSMUSG00000038257  | Glra3      | 187.7841 | 58.05596 | 1.695812 | 0.036997 | protein_co glycine receptor, alpha 3 subunit [Source:MGI Symbol;Acc:MGI:957     |
| ENSMUSG000000116250 | Gm34939    | 12.45265 | 2.603938 | 2.251676 | 0.03719  | antisense predicted gene, 34939 [Source:MGI Symbol;Acc:MGI:5594098]             |
| ENSMUSG00000012819  | Cdh23      | 138.4386 | 54.6163  | 1.344024 | 0.037855 | protein_co cadherin 23 (otocadherin) [Source:MGI Symbol;Acc:MGI:1890219]        |
| ENSMUSG000000107207 | Gm42897    | 1.410311 | 9.065139 | -2.72519 | 0.037967 | TEC predicted gene 42897 [Source:MGI Symbol;Acc:MGI:5663034]                    |
| ENSMUSG00000034107  | Ano7       | 16.77541 | 3.821272 | 2.128347 | 0.038466 | protein_co anoctamin 7 [Source:MGI Symbol;Acc:MGI:3052714]                      |
| ENSMUSG00000031075  | Ano1       | 79.18024 | 41.74621 | 0.918394 | 0.038652 | protein_co anoctamin 1, calcium activated chloride channel [Source:MGI Symbl    |
| ENSMUSG00000048004  | Tmem196    | 217.2561 | 107.2337 | 1.020399 | 0.038804 | protein_co transmembrane protein 196 [Source:MGI Symbol;Acc:MGI:268537          |
| ENSMUSG00000047180  | Neurl3     | 36.70843 | 15.3424  | 1.251547 | 0.038971 | protein_co neuralized E3 ubiquitin protein ligase 3 [Source:MGI Symbol;Acc:M    |
| ENSMUSG00000029798  | Herc6      | 101.4247 | 50.68523 | 0.999599 | 0.039003 | protein_co hect domain and RLD 6 [Source:MGI Symbol;Acc:MGI:1914388]            |
| ENSMUSG00000046618  | Olfml2a    | 112.3846 | 58.29696 | 0.948049 | 0.039519 | protein_co olfactomedin-like 2A [Source:MGI Symbol;Acc:MGI:2444741]             |
| ENSMUSG00000022603  | Mroh4      | 4.642993 | 0.322827 | 3.724383 | 0.040033 | protein_co maestro heat-like repeat family member 4 [Source:MGI Symbol;Ac       |
| ENSMUSG00000078350  | Smim1      | 311.6587 | 155.4883 | 1.003618 | 0.040076 | protein_co small integral membrane protein 1 [Source:MGI Symbol;Acc:MGI:1       |
| ENSMUSG00000038677  | Scube3     | 155.9196 | 72.45387 | 1.107085 | 0.040201 | protein_co signal peptide, CUB domain, EGF-like 3 [Source:MGI Symbol;Acc:M      |
| ENSMUSG00000027820  | Mme        | 129.8319 | 47.92454 | 1.439729 | 0.040625 | protein_co membrane metallo endopeptidase [Source:MGI Symbol;Acc:MGI:9          |
| ENSMUSG00000020374  | Rasgef1c   | 212.2506 | 114.4648 | 0.890285 | 0.040673 | protein_co RasGEF domain family, member 1C [Source:MGI Symbol;Acc:MGI:1         |
| ENSMUSG00000030223  | Ptpro      | 766.7649 | 242.9015 | 1.658131 | 0.040683 | protein_co protein tyrosine phosphatase, receptor type, O [Source:MGI Symbl     |
| ENSMUSG00000043648  | Pld6       | 46.62246 | 14.78566 | 1.651284 | 0.0407   | protein_co phospholipase D family, member 6 [Source:MGI Symbol;Acc:MGI:2        |
| ENSMUSG000000105265 | Sox2ot     | 861.0365 | 464.8129 | 0.889511 | 0.04116  | processed_SOX2 overlapping transcript (non-protein coding) [Source:MGI Sym      |
| ENSMUSG00000097174  | Gm4890     | 25.99024 | 9.898448 | 1.410627 | 0.041409 | bidirection predicted gene 4890 [Source:MGI Symbol;Acc:MGI:3779445]             |
| ENSMUSG00000021763  | BC067074   | 53.46696 | 22.84684 | 1.227069 | 0.041592 | protein_co cDNA sequence BC067074 [Source:MGI Symbol;Acc:MGI:3040697]           |
| ENSMUSG00000066113  | Adamtsl1   | 146.0438 | 77.06461 | 0.923064 | 0.041692 | protein_co ADAMTS-like 1 [Source:MGI Symbol;Acc:MGI:1924989]                    |
| ENSMUSG00000031665  | Sall1      | 477.3805 | 196.8227 | 1.278106 | 0.04191  | protein_co spalt like transcription factor 1 [Source:MGI Symbol;Acc:MGI:1889    |
| ENSMUSG00000058741  | Prr19      | 7.246919 | 1.307967 | 2.475383 | 0.042648 | protein_co proline rich 19 [Source:MGI Symbol;Acc:MGI:3648539]                  |
| ENSMUSG00000067261  | Foxd3      | 25.23404 | 0.29417  | 6.165051 | 0.042681 | protein_co forkhead box D3 [Source:MGI Symbol;Acc:MGI:1347473]                  |
| ENSMUSG000000105891 | A230001M10 | 61.16165 | 25.92276 | 1.239135 | 0.04282  | lincRNA RIKEN cDNA A230001M10 gene [Source:MGI Symbol;Acc:MGI:244               |
| ENSMUSG00000047586  | Nccrp1     | 9.111007 | 1.544824 | 2.524057 | 0.043094 | protein_co non-specific cytotoxic cell receptor protein 1 homolog (zebrafish) [ |
| ENSMUSG00000021219  | Rgs6       | 859.1065 | 429.8309 | 0.999415 | 0.043115 | protein_co regulator of G-protein signaling 6 [Source:MGI Symbol;Acc:MGI:13     |
| ENSMUSG000000113157 | Gm48693    | 6.133952 | 0.616997 | 3.260235 | 0.043149 | processed_predicted gene, 48693 [Source:MGI Symbol;Acc:MGI:6098323]             |
| ENSMUSG00000005611  | Mrv1       | 68.98698 | 35.84132 | 0.950708 | 0.043167 | protein_co MRV integration site 1 [Source:MGI Symbol;Acc:MGI:1338023]           |
| ENSMUSG00000057315  | Arhgap24   | 207.1097 | 91.74669 | 1.176013 | 0.043735 | protein_co Rho GTPase activating protein 24 [Source:MGI Symbol;Acc:MGI:19       |
| ENSMUSG00000025584  | Pde8a      | 440.3292 | 253.1648 | 0.799333 | 0.044    | protein_co phosphodiesterase 8A [Source:MGI Symbol;Acc:MGI:1277116]             |
| ENSMUSG00000064354  | mt-Co2     | 725.874  | 1875.124 | -1.36935 | 0.044031 | protein_co mitochondrially encoded cytochrome c oxidase II [Source:MGI Sym      |
| ENSMUSG00000020713  | Gh         | 701.599  | 38.51463 | 4.186904 | 0.044032 | protein_co growth hormone [Source:MGI Symbol;Acc:MGI:95707]                     |
| ENSMUSG000000106375 | Gm43361    | 0.638807 | 5.898847 | -3.16774 | 0.044077 | TEC predicted gene 43361 [Source:MGI Symbol;Acc:MGI:5663498]                    |

|                     |            |          |          |          |          |             |                                                                                                  |
|---------------------|------------|----------|----------|----------|----------|-------------|--------------------------------------------------------------------------------------------------|
| ENSMUSG00000097817  | Gm26810    | 3.595759 | 0        | 4.319697 | 0.044508 | antisense   | predicted gene, 26810 [Source:MGI Symbol;Acc:MGI:5477304]                                        |
| ENSMUSG00000086272  | BC039966   | 85.15061 | 18.43404 | 2.206653 | 0.044858 | antisense   | cDNA sequence BC039966 [Source:MGI Symbol;Acc:MGI:3039570]                                       |
| ENSMUSG00000019888  | Mgat4c     | 133.1006 | 59.99163 | 1.150282 | 0.045335 | protein_co  | MGAT4 family, member C [Source:MGI Symbol;Acc:MGI:1914819]                                       |
| ENSMUSG000000110397 | Gm45540    | 4.86304  | 0.368144 | 3.78275  | 0.046052 | TEC         | predicted gene 45540 [Source:MGI Symbol;Acc:MGI:5791376]                                         |
| ENSMUSG00000042761  | Mrap2      | 407.1296 | 152.0066 | 1.422037 | 0.046519 | protein_co  | melanocortin 2 receptor accessory protein 2 [Source:MGI Symbol;Acc:MGI:13039570]                 |
| ENSMUSG00000026196  | Bard1      | 19.98228 | 7.440733 | 1.442303 | 0.04653  | protein_co  | BRCA1 associated RING domain 1 [Source:MGI Symbol;Acc:MGI:13039570]                              |
| ENSMUSG00000028864  | Hgf        | 28.06555 | 5.402086 | 2.367777 | 0.046784 | protein_co  | hepatocyte growth factor [Source:MGI Symbol;Acc:MGI:96079]                                       |
| ENSMUSG000000107859 | Gm30731    | 39.92257 | 18.77671 | 1.097713 | 0.046976 | lincRNA     | predicted gene, 30731 [Source:MGI Symbol;Acc:MGI:5589890]                                        |
| ENSMUSG00000074939  | Chrm5      | 21.39439 | 3.228269 | 2.723617 | 0.046999 | protein_co  | cholinergic receptor, muscarinic 5 [Source:MGI Symbol;Acc:MGI:13039570]                          |
| ENSMUSG00000073421  | H2-Ab1     | 75.60164 | 36.78236 | 1.042911 | 0.047004 | protein_co  | histocompatibility 2, class II antigen A, beta 1 [Source:MGI Symbol;Acc:MGI:13039570]            |
| ENSMUSG00000028172  | Tacr3      | 89.53043 | 32.21374 | 1.475884 | 0.047159 | protein_co  | tachykinin receptor 3 [Source:MGI Symbol;Acc:MGI:892968]                                         |
| ENSMUSG00000045932  | Ifit2      | 179.8859 | 112.5796 | 0.675059 | 0.047243 | protein_co  | interferon-induced protein with tetratricopeptide repeats 2 [Source:MGI Symbol;Acc:MGI:13039570] |
| ENSMUSG00000085433  | Gm16001    | 61.25613 | 32.95642 | 0.896805 | 0.047371 | lincRNA     | predicted gene 16001 [Source:MGI Symbol;Acc:MGI:3802119]                                         |
| ENSMUSG00000078252  | Krtap17-1  | 4.179165 | 0        | 4.537883 | 0.047671 | protein_co  | keratin associated protein 17-1 [Source:MGI Symbol;Acc:MGI:19250]                                |
| ENSMUSG00000086126  | Evx1os     | 11.54231 | 1.544824 | 2.879508 | 0.047681 | antisense   | even skipped homeotic gene 1, opposite strand [Source:MGI Symbol;Acc:MGI:13039570]               |
| ENSMUSG00000025938  | Slco5a1    | 116.2787 | 45.25355 | 1.361037 | 0.047723 | protein_co  | solute carrier organic anion transporter family, member 5A1 [Source:MGI Symbol;Acc:MGI:13039570] |
| ENSMUSG00000024084  | Qpct       | 199.6241 | 85.59639 | 1.221093 | 0.048047 | protein_co  | glutaminy-peptide cyclotransferase (glutaminy cyclase) [Source:MGI Symbol;Acc:MGI:13039570]      |
| ENSMUSG00000085008  | Dbhos      | 6.127252 | 0.368144 | 4.121323 | 0.048064 | antisense   | dopamine beta hydroxylase, opposite strand [Source:MGI Symbol;Acc:MGI:13039570]                  |
| ENSMUSG00000024871  | Doc2g      | 379.3256 | 178.0272 | 1.090443 | 0.048948 | protein_co  | double C2, gamma [Source:MGI Symbol;Acc:MGI:1926250]                                             |
| ENSMUSG00000073154  | 9330158H04 | 39.37319 | 16.53013 | 1.251847 | 0.049706 | lincRNA     | RIKEN cDNA 9330158H04 gene [Source:MGI Symbol;Acc:MGI:2442]                                      |
| ENSMUSG000000109473 | B930025P03 | 14.19494 | 3.646392 | 1.974408 | 0.049713 | lincRNA     | RIKEN cDNA B930025P03 gene [Source:MGI Symbol;Acc:MGI:2443]                                      |
| ENSMUSG00000039684  | Gm5422     | 9.988126 | 1.353284 | 2.897469 | 0.04983  | transcribed | predicted pseudogene 5422 [Source:MGI Symbol;Acc:MGI:364341]                                     |
| ENSMUSG00000034755  | Pcdh11x    | 185.7843 | 74.35527 | 1.321398 | 0.049895 | protein_co  | protocadherin 11 X-linked [Source:MGI Symbol;Acc:MGI:2442849]                                    |

#### HF1GvsHFD

| gene_id            | gene_name | HF1G_fpkm | HFD_fpkm | log2FoldCh | pvalue   | gene_biot   | gene_description                                                                                                                |
|--------------------|-----------|-----------|----------|------------|----------|-------------|---------------------------------------------------------------------------------------------------------------------------------|
| ENSMUSG00000056648 | Hoxb8     | 28.63292  | 0.345477 | 6.39235    | 0.000549 | protein_co  | homeobox B8 [Source:MGI Symbol;Acc:MGI:96189]                                                                                   |
| ENSMUSG00000000690 | Hoxb6     | 40.319    | 1.21437  | 5.030096   | 0.001041 | protein_co  | homeobox B6 [Source:MGI Symbol;Acc:MGI:96187]                                                                                   |
| ENSMUSG00000044285 | Gm1821    | 270.3343  | 92.10169 | 1.552506   | 0.001176 | transcribed | predicted gene 1821 [Source:MGI Symbol;Acc:MGI:3037679]                                                                         |
| ENSMUSG00000019874 | Fabp7     | 248.0651  | 787.7392 | -1.6663    | 0.001236 | protein_co  | fatty acid binding protein 7, brain [Source:MGI Symbol;Acc:MGI:103037679]                                                       |
| ENSMUSG00000020713 | Gh        | 4.910129  | 668.7009 | -7.08542   | 0.001434 | protein_co  | growth hormone [Source:MGI Symbol;Acc:MGI:95707]                                                                                |
| ENSMUSG00000099342 | Gm18180   | 4.954174  | 24.7798  | -2.33967   | 0.00241  | processed_  | predicted gene, 18180 [Source:MGI Symbol;Acc:MGI:5010365]                                                                       |
| ENSMUSG00000021250 | Fos       | 101.913   | 316.0442 | -1.63453   | 0.002476 | protein_co  | FBJ osteosarcoma oncogene [Source:MGI Symbol;Acc:MGI:95574]                                                                     |
| ENSMUSG00000053441 | Adamts19  | 5.108691  | 66.57302 | -3.70072   | 0.002738 | protein_co  | a disintegrin-like and metallopeptidase (reprolysin type) with thrombospondin type 1 motifs [Source:MGI Symbol;Acc:MGI:2442849] |



|                    |             |          |          |          |          |                                                                                |
|--------------------|-------------|----------|----------|----------|----------|--------------------------------------------------------------------------------|
| ENSMUSG0000063935  | Zar1        | 1.681013 | 19.16337 | -3.49515 | 0.00332  | protein_co zygote arrest 1 [Source:MGI Symbol;Acc:MGI:2180337]                 |
| ENSMUSG00000051985 | Igfn1       | 60.35827 | 259.5613 | -2.10487 | 0.004452 | protein_co immunoglobulin-like and fibronectin type III domain containing 1 [S |
| ENSMUSG00000031491 | Chrna6      | 6.931198 | 100.674  | -3.85476 | 0.004488 | protein_co cholinergic receptor, nicotinic, alpha polypeptide 6 [Source:MGI Sy |
| ENSMUSG00000036480 | Prss56      | 3.748467 | 34.61264 | -3.20072 | 0.004527 | protein_co protease, serine 56 [Source:MGI Symbol;Acc:MGI:1916703]             |
| ENSMUSG00000108993 | Gm44846     | 0        | 6.321678 | -5.05771 | 0.005315 | TEC predicted gene 44846 [Source:MGI Symbol;Acc:MGI:5753422]                   |
| ENSMUSG00000027485 | Bpifb1      | 6.787365 | 0        | 5.271087 | 0.006706 | protein_co BPI fold containing family B, member 1 [Source:MGI Symbol;Acc:M     |
| ENSMUSG00000028197 | Col24a1     | 37.75693 | 167.8478 | -2.15049 | 0.007286 | protein_co collagen, type XXIV, alpha 1 [Source:MGI Symbol;Acc:MGI:1918605     |
| ENSMUSG00000012819 | Cdh23       | 42.27023 | 131.8788 | -1.64179 | 0.01034  | protein_co cadherin 23 (otocadherin) [Source:MGI Symbol;Acc:MGI:1890219]       |
| ENSMUSG00000116755 | CT025584.1  | 0.320253 | 14.68501 | -5.3082  | 0.010547 | lincRNA novel transcript                                                       |
| ENSMUSG00000110086 | Gm45623     | 21.68115 | 66.11    | -1.60908 | 0.010568 | protein_co predicted gene 45623 [Source:MGI Symbol;Acc:MGI:5791459]            |
| ENSMUSG00000060284 | Sp7         | 31.50872 | 114.6882 | -1.86082 | 0.011476 | protein_co Sp7 transcription factor 7 [Source:MGI Symbol;Acc:MGI:2153568]      |
| ENSMUSG00000031167 | Rbm3        | 2347.569 | 1285.283 | 0.869178 | 0.011699 | protein_co RNA binding motif (RNP1, RRM) protein 3 [Source:MGI Symbol;Acc      |
| ENSMUSG00000018166 | ErbB3       | 213.0063 | 371.0472 | -0.80039 | 0.011802 | protein_co erb-B2 receptor tyrosine kinase 3 [Source:MGI Symbol;Acc:MGI:95     |
| ENSMUSG00000105504 | Gbp5        | 98.2162  | 36.17942 | 1.444242 | 0.012152 | protein_co guanylate binding protein 5 [Source:MGI Symbol;Acc:MGI:2429943      |
| ENSMUSG00000113722 | Snhg10      | 47.31093 | 97.41196 | -1.0442  | 0.012188 | lincRNA small nucleolar RNA host gene 10 [Source:MGI Symbol;Acc:MGI:19         |
| ENSMUSG00000109297 | Gm31522     | 0        | 5.623278 | -4.8826  | 0.012497 | lincRNA predicted gene, 31522 [Source:MGI Symbol;Acc:MGI:5590681]              |
| ENSMUSG00000073154 | 9330158H04  | 10.69269 | 37.50526 | -1.80179 | 0.012588 | lincRNA RIKEN cDNA 9330158H04 gene [Source:MGI Symbol;Acc:MGI:2442             |
| ENSMUSG00000050473 | Slc35d3     | 23.94614 | 73.15179 | -1.60656 | 0.012676 | protein_co solute carrier family 35, member D3 [Source:MGI Symbol;Acc:MGI:     |
| ENSMUSG00000115624 | Gm49204     | 20.92573 | 58.02716 | -1.4732  | 0.012936 | TEC predicted gene, 49204 [Source:MGI Symbol;Acc:MGI:6118653]                  |
| ENSMUSG00000076498 | Trbc2       | 8.309421 | 32.97256 | -1.99119 | 0.01333  | TR_C_gene T cell receptor beta, constant 2 [Source:MGI Symbol;Acc:MGI:4835     |
| ENSMUSG00000020007 | Il20ra      | 3.147566 | 16.14808 | -2.36318 | 0.013864 | protein_co interleukin 20 receptor, alpha [Source:MGI Symbol;Acc:MGI:36050     |
| ENSMUSG00000025229 | Pitx3       | 0.667089 | 13.67694 | -4.33845 | 0.013938 | protein_co paired-like homeodomain transcription factor 3 [Source:MGI Symb     |
| ENSMUSG00000026308 | Khlh30      | 3.302083 | 29.99642 | -3.16701 | 0.014215 | protein_co kelch-like 30 [Source:MGI Symbol;Acc:MGI:1918038]                   |
| ENSMUSG00000087075 | Lbhd2       | 19.26422 | 102.7035 | -2.41129 | 0.01481  | protein_co LBH domain containing 2 [Source:MGI Symbol;Acc:MGI:2685744]         |
| ENSMUSG00000084390 | Gm15425     | 7.691057 | 0.651287 | 3.593534 | 0.015368 | processed_predicted gene 15425 [Source:MGI Symbol;Acc:MGI:3705642]             |
| ENSMUSG00000095041 | AC149090.1  | 7725.331 | 12451.89 | -0.68867 | 0.016422 | protein_coding                                                                 |
| ENSMUSG00000079363 | Gbp4        | 166.5749 | 41.15743 | 2.017806 | 0.016763 | protein_co guanylate binding protein 4 [Source:MGI Symbol;Acc:MGI:97072]       |
| ENSMUSG00000080242 | Atp6v0c-ps2 | 103.8517 | 25.63096 | 2.018152 | 0.016918 | processed_ATPase, H+ transporting, lysosomal V0 subunit C, pseudogene 2 [Sc    |
| ENSMUSG00000111193 | Gm35288     | 0.320253 | 6.104072 | -4.04224 | 0.017381 | lincRNA predicted gene, 35288 [Source:MGI Symbol;Acc:MGI:5594447]              |
| ENSMUSG00000097488 | 4732487G21  | 59.39097 | 32.05267 | 0.890565 | 0.017441 | lincRNA RIKEN cDNA 4732487G21 gene [Source:MGI Symbol;Acc:MGI:2441             |
| ENSMUSG00000115354 | Gm49083     | 0.346836 | 11.57572 | -4.96434 | 0.017603 | lincRNA predicted gene, 49083 [Source:MGI Symbol;Acc:MGI:6118469]              |
| ENSMUSG00000041679 | Lrrc29      | 101.4423 | 51.93644 | 0.970018 | 0.017786 | protein_co leucine rich repeat containing 29 [Source:MGI Symbol;Acc:MGI:244    |
| ENSMUSG00000090698 | Apold1      | 47.82117 | 121.427  | -1.34474 | 0.019705 | protein_co apolipoprotein L domain containing 1 [Source:MGI Symbol;Acc:MG      |
| ENSMUSG00000045613 | Chrm2       | 130.7983 | 299.0951 | -1.19291 | 0.020267 | protein_co cholinergic receptor, muscarinic 2, cardiac [Source:MGI Symbol;Ac   |



|                    |             |          |          |          |          |                                                                                 |
|--------------------|-------------|----------|----------|----------|----------|---------------------------------------------------------------------------------|
| ENSMUSG00000112975 | Gm21297     | 0.320253 | 6.177794 | -4.06698 | 0.020347 | processed_ predicted gene, 21297 [Source:MGI Symbol;Acc:MGI:5434652]            |
| ENSMUSG00000110016 | Gm20751     | 65.91358 | 35.87372 | 0.875257 | 0.020937 | lincRNA predicted gene, 20751 [Source:MGI Symbol;Acc:MGI:5434107]               |
| ENSMUSG00000071665 | Foxr2       | 30.54328 | 11.47457 | 1.412818 | 0.021174 | protein_co forkhead box R2 [Source:MGI Symbol;Acc:MGI:3511682]                  |
| ENSMUSG00000047606 | Ankrd34c    | 53.92388 | 140.031  | -1.3754  | 0.021584 | protein_co ankyrin repeat domain 34C [Source:MGI Symbol;Acc:MGI:2685617]        |
| ENSMUSG00000090084 | Srpx        | 2.387707 | 10.95706 | -2.18853 | 0.022385 | protein_co sushi-repeat-containing protein [Source:MGI Symbol;Acc:MGI:1858]     |
| ENSMUSG00000096225 | Lhx8        | 0.686891 | 16.09386 | -4.55244 | 0.022651 | protein_co LIM homeobox protein 8 [Source:MGI Symbol;Acc:MGI:1096343]           |
| ENSMUSG00000057836 | Xlr3a       | 15.47986 | 36.95899 | -1.25821 | 0.022751 | protein_co X-linked lymphocyte-regulated 3A [Source:MGI Symbol;Acc:MGI:10]      |
| ENSMUSG00000028860 | Sytl1       | 17.37246 | 39.65937 | -1.19351 | 0.022846 | protein_co synaptotagmin-like 1 [Source:MGI Symbol;Acc:MGI:1933365]             |
| ENSMUSG00000067455 | Hist1h4j    | 3.120984 | 12.90827 | -2.05628 | 0.022872 | protein_co histone cluster 1, H4j [Source:MGI Symbol;Acc:MGI:2448436]           |
| ENSMUSG00000111017 | Gm48314     | 0        | 4.204661 | -4.46542 | 0.023312 | TEC predicted gene, 48314 [Source:MGI Symbol;Acc:MGI:6097766]                   |
| ENSMUSG00000099719 | Gm28802     | 4.095303 | 0        | 4.54828  | 0.023587 | unprocess predicted gene 28802 [Source:MGI Symbol;Acc:MGI:5579508]              |
| ENSMUSG00000035179 | Ppp1r32     | 51.66391 | 23.61693 | 1.133247 | 0.024393 | protein_co protein phosphatase 1, regulatory subunit 32 [Source:MGI Symbol;     |
| ENSMUSG00000017309 | Cd300lg     | 10.48501 | 2.256714 | 2.232134 | 0.024676 | protein_co CD300 molecule like family member G [Source:MGI Symbol;Acc:M]        |
| ENSMUSG00000045471 | Hcrt        | 2.394487 | 16.19684 | -2.75908 | 0.025079 | protein_co hypocretin [Source:MGI Symbol;Acc:MGI:1202306]                       |
| ENSMUSG00000038491 | Cdk19os     | 0.346836 | 5.345611 | -3.85533 | 0.025239 | antisense cyclin-dependent kinase 19, opposite strand [Source:MGI Symbol;A]     |
| ENSMUSG00000027849 | Syt6        | 232.9937 | 551.9873 | -1.24354 | 0.025635 | protein_co synaptotagmin VI [Source:MGI Symbol;Acc:MGI:1859544]                 |
| ENSMUSG00000021303 | Gng4        | 373.2055 | 1213.663 | -1.70137 | 0.025848 | protein_co guanine nucleotide binding protein (G protein), gamma 4 [Source:M]   |
| ENSMUSG00000025094 | Slc18a2     | 177.9385 | 590.801  | -1.73112 | 0.026264 | protein_co solute carrier family 18 (vesicular monoamine), member 2 [Source:    |
| ENSMUSG00000024211 | Grm8        | 100.0067 | 203.632  | -1.02662 | 0.026322 | protein_co glutamate receptor, metabotropic 8 [Source:MGI Symbol;Acc:MGI:       |
| ENSMUSG00000064179 | Tnnt1       | 21.71739 | 82.88769 | -1.93171 | 0.02673  | protein_co troponin T1, skeletal, slow [Source:MGI Symbol;Acc:MGI:1333868]      |
| ENSMUSG00000042918 | Mamstr      | 85.138   | 45.78863 | 0.896407 | 0.026864 | protein_co MEF2 activating motif and SAP domain containing transcriptional r    |
| ENSMUSG00000071547 | Nt5dc2      | 224.3558 | 134.549  | 0.738381 | 0.026935 | protein_co 5'-nucleotidase domain containing 2 [Source:MGI Symbol;Acc:MGI]      |
| ENSMUSG00000097303 | 3110083C13f | 6.456428 | 19.04467 | -1.55817 | 0.026998 | bidirection RIKEN cDNA 3110083C13 gene [Source:MGI Symbol;Acc:MGI:1920]         |
| ENSMUSG00000053368 | Rxfp2       | 1.720618 | 9.961833 | -2.53859 | 0.027021 | protein_co relaxin/insulin-like family peptide receptor 2 [Source:MGI Symbol;A] |
| ENSMUSG00000017832 | Hspb9       | 4.801997 | 0.30581  | 3.815262 | 0.027408 | protein_co heat shock protein, alpha-crystallin-related, B9 [Source:MGI Symbc   |
| ENSMUSG00000107749 | Gm44321     | 1.033727 | 7.061168 | -2.77124 | 0.027711 | TEC predicted gene, 44321 [Source:MGI Symbol;Acc:MGI:5690713]                   |
| ENSMUSG00000030549 | Rhcg        | 3.880842 | 24.32767 | -2.65382 | 0.02812  | protein_co Rhesus blood group-associated C glycoprotein [Source:MGI Symbo       |
| ENSMUSG00000115783 | Bc1         | 9.983655 | 34.26372 | -1.78227 | 0.028311 | lincRNA brain cytoplasmic RNA 1 [Source:MGI Symbol;Acc:MGI:104905]              |
| ENSMUSG00000100287 | Gm28068     | 3.741688 | 0        | 4.418553 | 0.028683 | lincRNA predicted gene 28068 [Source:MGI Symbol;Acc:MGI:5578774]                |
| ENSMUSG00000092574 | 2810047C21f | 5.029481 | 0.345477 | 3.886858 | 0.028746 | transcribed RIKEN cDNA 2810047C21 gene 1 [Source:MGI Symbol;Acc:MGI:191]        |
| ENSMUSG00000056025 | Clca3a1     | 5.247845 | 30.47721 | -2.53966 | 0.029005 | protein_co chloride channel accessory 3A1 [Source:MGI Symbol;Acc:MGI:1316]      |
| ENSMUSG00000073409 | H2-Q6       | 125.785  | 37.30405 | 1.755954 | 0.029063 | protein_co histocompatibility 2, Q region locus 6 [Source:MGI Symbol;Acc:MG     |
| ENSMUSG00000023274 | Cd4         | 4.369171 | 24.46504 | -2.48043 | 0.029223 | protein_co CD4 antigen [Source:MGI Symbol;Acc:MGI:88335]                        |
| ENSMUSG00000030098 | Grip2       | 418.8549 | 827.8603 | -0.98252 | 0.029309 | protein_co glutamate receptor interacting protein 2 [Source:MGI Symbol;Acc:]    |

|                    |             |          |          |          |          |                                                                              |
|--------------------|-------------|----------|----------|----------|----------|------------------------------------------------------------------------------|
| ENSMUSG00000107499 | Ccdc142     | 0.686891 | 6.299751 | -3.19897 | 0.030604 | protein_co coiled-coil domain containing 142 [Source:MGI Symbol;Acc:MGI:3C   |
| ENSMUSG00000064364 | mt-Th       | 158.2371 | 71.07074 | 1.156907 | 0.030874 | Mt_tRNA mitochondrially encoded tRNA histidine [Source:MGI Symbol;Acc:M      |
| ENSMUSG00000032125 | Robo4       | 211.5625 | 135.2668 | 0.644832 | 0.031612 | protein_co roundabout guidance receptor 4 [Source:MGI Symbol;Acc:MGI:192     |
| ENSMUSG00000035451 | Foxa1       | 0.640507 | 15.791   | -4.58636 | 0.033367 | protein_co forkhead box A1 [Source:MGI Symbol;Acc:MGI:1347472]               |
| ENSMUSG00000102222 | Pcdhga10    | 5.462842 | 0.345477 | 4.002127 | 0.033369 | protein_co protocadherin gamma subfamily A, 10 [Source:MGI Symbol;Acc:M      |
| ENSMUSG00000099964 | Gm29514     | 25.18965 | 47.88057 | -0.92973 | 0.033397 | antisense predicted gene 29514 [Source:MGI Symbol;Acc:MGI:5580220]           |
| ENSMUSG00000038550 | Ciart       | 408.2729 | 242.0425 | 0.754354 | 0.033421 | protein_co circadian associated repressor of transcription [Source:MGI Symbo |
| ENSMUSG00000029019 | Nppb        | 4.762392 | 0.30581  | 3.805203 | 0.033878 | protein_co natriuretic peptide type B [Source:MGI Symbol;Acc:MGI:97368]      |
| ENSMUSG00000027233 | Patl2       | 0.693671 | 8.313782 | -3.59307 | 0.034766 | protein_co protein associated with topoisomerase II homolog 2 (yeast) [Sourc |
| ENSMUSG00000103477 | 5930409G06I | 20.6542  | 56.16112 | -1.44263 | 0.035091 | TEC RIKEN cDNA 5930409G06 gene [Source:MGI Symbol;Acc:MGI:1924               |
| ENSMUSG00000026489 | Coq8a       | 1097.809 | 748.5378 | 0.55248  | 0.035327 | protein_co coenzyme Q8A [Source:MGI Symbol;Acc:MGI:1914676]                  |
| ENSMUSG00000045534 | Kcna5       | 35.68768 | 83.7591  | -1.23056 | 0.035489 | protein_co potassium voltage-gated channel, shaker-related subfamily, memb   |
| ENSMUSG00000061086 | Myl4        | 27.88171 | 68.59869 | -1.30063 | 0.03559  | protein_co myosin, light polypeptide 4 [Source:MGI Symbol;Acc:MGI:97267]     |
| ENSMUSG00000005892 | Trh         | 29.08274 | 156.3334 | -2.42819 | 0.036888 | protein_co thyrotropin releasing hormone [Source:MGI Symbol;Acc:MGI:9882     |
| ENSMUSG00000025652 | Tmem89      | 0        | 3.994501 | -4.39983 | 0.037004 | protein_co transmembrane protein 89 [Source:MGI Symbol;Acc:MGI:1916634       |
| ENSMUSG00000091955 | Gm9844      | 49.603   | 124.3898 | -1.32842 | 0.037137 | protein_co predicted pseudogene 9844 [Source:MGI Symbol;Acc:MGI:370428;      |
| ENSMUSG00000083226 | Gm7831      | 7.589704 | 0.91743  | 3.0199   | 0.037296 | processed_predicted gene 7831 [Source:MGI Symbol;Acc:MGI:3643841]            |
| ENSMUSG00000037034 | Pax1        | 6.595582 | 0.957097 | 2.787667 | 0.037583 | protein_co paired box 1 [Source:MGI Symbol;Acc:MGI:97485]                    |
| ENSMUSG00000045010 | Gm4779      | 6.096033 | 22.07586 | -1.85194 | 0.03774  | protein_co predicted gene 4779 [Source:MGI Symbol;Acc:MGI:3646776]           |
| ENSMUSG00000098202 | B830012L14F | 1.727398 | 8.321119 | -2.26947 | 0.037909 | lincRNA RIKEN cDNA B830012L14 gene [Source:MGI Symbol;Acc:MGI:2443           |
| ENSMUSG00000024670 | Cd6         | 2.087257 | 10.81288 | -2.37523 | 0.037943 | protein_co CD6 antigen [Source:MGI Symbol;Acc:MGI:103566]                    |
| ENSMUSG00000041616 | Nppa        | 1.033727 | 9.505813 | -3.19503 | 0.0386   | protein_co natriuretic peptide type A [Source:MGI Symbol;Acc:MGI:97367]      |
| ENSMUSG00000062200 | Vmn2r7      | 5.336711 | 0        | 4.931613 | 0.038766 | protein_co vomeronasal 2, receptor 7 [Source:MGI Symbol;Acc:MGI:2441693]     |
| ENSMUSG00000101578 | Vmn1r206    | 0.96076  | 13.70018 | -3.79621 | 0.039896 | protein_co vomeronasal 1 receptor 206 [Source:MGI Symbol;Acc:MGI:215966      |
| ENSMUSG00000035582 | Gdpd4       | 4.322787 | 32.99262 | -2.92264 | 0.04044  | protein_co glycerophosphodiester phosphodiesterase domain containing 4 [Sc   |
| ENSMUSG00000050211 | Pla2g4e     | 270.1998 | 139.2248 | 0.957768 | 0.040568 | protein_co phospholipase A2, group IVE [Source:MGI Symbol;Acc:MGI:191914     |
| ENSMUSG00000110236 | Gm40493     | 3.074599 | 12.68007 | -2.041   | 0.040713 | antisense predicted gene, 40493 [Source:MGI Symbol;Acc:MGI:5623378]          |
| ENSMUSG00000115284 | Gm34678     | 7.503178 | 1.562804 | 2.254359 | 0.040937 | antisense predicted gene, 34678 [Source:MGI Symbol;Acc:MGI:5593837]          |
| ENSMUSG00000107089 | Gm43443     | 2.087257 | 11.02753 | -2.40535 | 0.041013 | TEC predicted gene 43443 [Source:MGI Symbol;Acc:MGI:5663580]                 |
| ENSMUSG00000075408 | 6030408B16F | 1.007145 | 6.633402 | -2.70107 | 0.04164  | protein_co RIKEN cDNA 6030408B16 gene [Source:MGI Symbol;Acc:MGI:1924        |
| ENSMUSG00000081223 | Gm12247     | 6.390241 | 0.61162  | 3.358421 | 0.041733 | processed_predicted gene 12247 [Source:MGI Symbol;Acc:MGI:3649489]           |
| ENSMUSG00000028717 | Tal1        | 44.13542 | 138.8736 | -1.65318 | 0.04183  | protein_co T cell acute lymphocytic leukemia 1 [Source:MGI Symbol;Acc:MGI:!  |
| ENSMUSG00000113138 | Gm47177     | 0        | 3.944431 | -4.37152 | 0.041831 | lincRNA predicted gene, 47177 [Source:MGI Symbol;Acc:MGI:6095962]            |
| ENSMUSG00000103160 | C130012C08I | 2.955247 | 14.19729 | -2.24294 | 0.042461 | TEC RIKEN cDNA C130012C08 gene [Source:MGI Symbol;Acc:MGI:2145               |

|                    |            |          |          |          |          |                                                                                                           |
|--------------------|------------|----------|----------|----------|----------|-----------------------------------------------------------------------------------------------------------|
| ENSMUSG00000111692 | Gm49373    | 3.788072 | 12.64508 | -1.74136 | 0.042687 | protein_co predicted gene, 49373 [Source:MGI Symbol;Acc:MGI:6121591]                                      |
| ENSMUSG00000030858 | Fam24b     | 7.463573 | 1.60247  | 2.232358 | 0.043029 | protein_co family with sequence similarity 24 member B [Source:MGI Symbol;Acc:MGI:109375]                 |
| ENSMUSG00000008461 | Fut1       | 4.689425 | 0.302853 | 3.78564  | 0.043052 | protein_co fucosyltransferase 1 [Source:MGI Symbol;Acc:MGI:109375]                                        |
| ENSMUSG00000039684 | Gm5422     | 0.733276 | 9.505813 | -3.73384 | 0.043167 | transcribed predicted pseudogene 5422 [Source:MGI Symbol;Acc:MGI:364341]                                  |
| ENSMUSG00000074824 | Rslcn18    | 0.346836 | 4.547181 | -3.61477 | 0.043281 | protein_co regulator of sex-limitation candidate 18 [Source:MGI Symbol;Acc:MGI:109375]                    |
| ENSMUSG00000035238 | Kcnk15     | 6.670889 | 29.82185 | -2.14998 | 0.043569 | protein_co potassium channel, subfamily K, member 15 [Source:MGI Symbol;Acc:MGI:109375]                   |
| ENSMUSG00000108547 | Gm45186    | 0        | 3.725401 | -4.2977  | 0.043587 | processed_predicted gene 45186 [Source:MGI Symbol;Acc:MGI:5753762]                                        |
| ENSMUSG00000050370 | Ch25h      | 5.022701 | 17.07898 | -1.75732 | 0.043958 | protein_co cholesterol 25-hydroxylase [Source:MGI Symbol;Acc:MGI:1333869]                                 |
| ENSMUSG00000071691 | Gm960      | 99.45513 | 61.45929 | 0.694635 | 0.044663 | protein_co predicted gene 960 [Source:MGI Symbol;Acc:MGI:2685806]                                         |
| ENSMUSG00000032259 | Drd2       | 79.90044 | 283.1917 | -1.82486 | 0.04471  | protein_co dopamine receptor D2 [Source:MGI Symbol;Acc:MGI:94924]                                         |
| ENSMUSG00000090550 | Prlh       | 9.579751 | 0.914473 | 3.3689   | 0.044949 | protein_co prolactin releasing hormone [Source:MGI Symbol;Acc:MGI:364466]                                 |
| ENSMUSG00000115691 | Gm48914    | 3.553809 | 14.32954 | -2.02425 | 0.04508  | lincRNA predicted gene, 48914 [Source:MGI Symbol;Acc:MGI:6118221]                                         |
| ENSMUSG00000104705 | 4930405N21 | 0        | 3.428461 | -4.17764 | 0.04528  | TEC RIKEN cDNA 4930405N21 gene [Source:MGI Symbol;Acc:MGI:1921]                                           |
| ENSMUSG00000068452 | Duox2      | 0.366638 | 8.594296 | -4.5339  | 0.046088 | protein_co dual oxidase 2 [Source:MGI Symbol;Acc:MGI:3036280]                                             |
| ENSMUSG00000024669 | Cd5        | 12.90164 | 2.205221 | 2.550219 | 0.046978 | protein_co CD5 antigen [Source:MGI Symbol;Acc:MGI:88340]                                                  |
| ENSMUSG00000105265 | Sox2ot     | 455.9461 | 820.1683 | -0.84696 | 0.047466 | processed_SOX2 overlapping transcript (non-protein coding) [Source:MGI Symbol;Acc:MGI:109375]             |
| ENSMUSG00000113216 | Gm40841    | 183.5195 | 276.5336 | -0.59026 | 0.047708 | lincRNA predicted gene, 40841 [Source:MGI Symbol;Acc:MGI:5623726]                                         |
| ENSMUSG00000031410 | Nxf7       | 1.007145 | 8.686989 | -3.08726 | 0.047836 | protein_co nuclear RNA export factor 7 [Source:MGI Symbol;Acc:MGI:215934]                                 |
| ENSMUSG00000089737 | Gm15688    | 50.48869 | 26.28255 | 0.939063 | 0.048182 | antisense predicted gene 15688 [Source:MGI Symbol;Acc:MGI:3647549]                                        |
| ENSMUSG00000045903 | Npas4      | 104.9226 | 249.0548 | -1.24771 | 0.048239 | protein_co neuronal PAS domain protein 4 [Source:MGI Symbol;Acc:MGI:2664]                                 |
| ENSMUSG00000070084 | Mir486     | 6.17578  | 0.996764 | 2.670647 | 0.048289 | miRNA microRNA 486 [Source:MGI Symbol;Acc:MGI:3619423]                                                    |
| ENSMUSG00000039079 | Trhr2      | 6.155977 | 21.33341 | -1.79266 | 0.048387 | protein_co thyrotropin releasing hormone receptor 2 [Source:MGI Symbol;Acc:MGI:109375]                    |
| ENSMUSG00000086565 | Gm13133    | 4.227678 | 0.345477 | 3.625459 | 0.048662 | antisense predicted gene 13133 [Source:MGI Symbol;Acc:MGI:3650642]                                        |
| ENSMUSG00000027210 | Meis2      | 611.5532 | 1503.817 | -1.2981  | 0.049298 | protein_co Meis homeobox 2 [Source:MGI Symbol;Acc:MGI:108564]                                             |
| ENSMUSG00000068794 | Col28a1    | 8.58329  | 23.24158 | -1.43371 | 0.049548 | protein_co collagen, type XXVIII, alpha 1 [Source:MGI Symbol;Acc:MGI:268531]                              |
| ENSMUSG00000025938 | Slco5a1    | 42.37993 | 110.6853 | -1.38438 | 0.049603 | protein_co solute carrier organic anion transporter family, member 5A1 [Source:MGI Symbol;Acc:MGI:109375] |

## HF1G vs STD

| gene_id            | gene_name   | HF1G_fpkm | STD_fpkm | log2FoldCh | pvalue   | gene_bioty | gene_description                                                           |
|--------------------|-------------|-----------|----------|------------|----------|------------|----------------------------------------------------------------------------|
| ENSMUSG00000115625 | 2900040C04f | 113.0136  | 34.12098 | 1.732883   | 0.000624 | lincRNA    | RIKEN cDNA 2900040C04 gene [Source:MGI Symbol;Acc:MGI:1920]                |
| ENSMUSG00000059824 | Dbp         | 1864.062  | 890.266  | 1.066155   | 0.00095  | protein_co | D site albumin promoter binding protein [Source:MGI Symbol;Acc:MGI:109375] |
| ENSMUSG00000026247 | Ecel1       | 191.3658  | 79.74938 | 1.265939   | 0.001222 | protein_co | endothelin converting enzyme-like 1 [Source:MGI Symbol;Acc:MGI:109375]     |
| ENSMUSG00000036151 | Tm6sf2      | 66.30088  | 142.0528 | -1.09913   | 0.00143  | protein_co | transmembrane 6 superfamily member 2 [Source:MGI Symbol;Acc:MGI:109375]    |
| ENSMUSG00000061808 | Ttr         | 41233.42  | 14978.32 | 1.460955   | 0.001582 | protein_co | transthyretin [Source:MGI Symbol;Acc:MGI:98865]                            |

|                     |            |          |          |          |          |                                                                                |
|---------------------|------------|----------|----------|----------|----------|--------------------------------------------------------------------------------|
| ENSMUSG000000100241 | Slc18a3    | 54.49013 | 7.793206 | 2.817481 | 0.001586 | protein_co solute carrier family 18 (vesicular monoamine), member 3 [Source:   |
| ENSMUSG000000079845 | Xlr4a      | 14.98909 | 1.513124 | 3.279315 | 0.001942 | protein_co X-linked lymphocyte-regulated 4A [Source:MGI Symbol;Acc:MGI:35      |
| ENSMUSG000000022769 | Sdf2l1     | 236.2118 | 567.3561 | -1.26453 | 0.002381 | protein_co stromal cell-derived factor 2-like 1 [Source:MGI Symbol;Acc:MGI:2   |
| ENSMUSG000000015652 | Steap1     | 62.88593 | 21.36309 | 1.565939 | 0.003613 | protein_co six transmembrane epithelial antigen of the prostate 1 [Source:MG   |
| ENSMUSG000000057969 | Sema3b     | 244.8598 | 97.689   | 1.328395 | 0.004049 | protein_co sema domain, immunoglobulin domain (Ig), short basic domain, se     |
| ENSMUSG000000025316 | Banp       | 575.0741 | 1054.056 | -0.87418 | 0.005006 | protein_co BTG3 associated nuclear protein [Source:MGI Symbol;Acc:MGI:188      |
| ENSMUSG000000026051 | 1500015O10 | 510.8611 | 250.8015 | 1.027821 | 0.005018 | protein_co RIKEN cDNA 1500015O10 gene [Source:MGI Symbol;Acc:MGI:1926          |
| ENSMUSG000000042328 | Hps4       | 529.7561 | 865.517  | -0.70784 | 0.005213 | protein_co HPS4, biogenesis of lysosomal organelles complex 3 subunit 2 [Sou   |
| ENSMUSG000000021342 | Prl        | 8.257616 | 67.15379 | -3.02222 | 0.005425 | protein_co prolactin [Source:MGI Symbol;Acc:MGI:97762]                         |
| ENSMUSG000000032575 | Manf       | 775.1208 | 1390.573 | -0.84334 | 0.00574  | protein_co mesencephalic astrocyte-derived neurotrophic factor [Source:MGI     |
| ENSMUSG000000067455 | Hist1h4j   | 3.157232 | 15.2114  | -2.27841 | 0.006979 | protein_co histone cluster 1, H4j [Source:MGI Symbol;Acc:MGI:2448436]          |
| ENSMUSG000000022949 | Clic6      | 644.9482 | 350.5361 | 0.880364 | 0.007902 | protein_co chloride intracellular channel 6 [Source:MGI Symbol;Acc:MGI:2146    |
| ENSMUSG000000038550 | Ciart      | 412.7488 | 217.3406 | 0.925705 | 0.008048 | protein_co circadian associated repressor of transcription [Source:MGI Symbo   |
| ENSMUSG000000071665 | Foxr2      | 30.89568 | 7.76746  | 1.985723 | 0.008158 | protein_co forkhead box R2 [Source:MGI Symbol;Acc:MGI:3511682]                 |
| ENSMUSG000000002835 | Chaf1a     | 97.46879 | 51.21988 | 0.926813 | 0.008252 | protein_co chromatin assembly factor 1, subunit A (p150) [Source:MGI Symbo     |
| ENSMUSG000000043872 | Zmym1      | 199.0976 | 440.9983 | -1.14827 | 0.008341 | protein_co zinc finger, MYM domain containing 1 [Source:MGI Symbol;Acc:MC      |
| ENSMUSG000000029847 | Slc23a4    | 18.88338 | 4.553414 | 2.031231 | 0.008393 | protein_co solute carrier family 23 member 4 [Source:MGI Symbol;Acc:MGI:19     |
| ENSMUSG000000001827 | Folr1      | 201.0514 | 64.04013 | 1.651109 | 0.008485 | protein_co folate receptor 1 (adult) [Source:MGI Symbol;Acc:MGI:95568]         |
| ENSMUSG000000020681 | Ace        | 780.6455 | 411.9943 | 0.922619 | 0.008693 | protein_co angiotensin I converting enzyme (peptidyl-dipeptidase A) 1 [Source  |
| ENSMUSG000000022425 | Enpp2      | 10320.49 | 4982.406 | 1.050661 | 0.008872 | protein_co ectonucleotide pyrophosphatase/phosphodiesterase 2 [Source:MG       |
| ENSMUSG000000026864 | Hspa5      | 4112.785 | 7163.086 | -0.80048 | 0.00952  | protein_co heat shock protein 5 [Source:MGI Symbol;Acc:MGI:95835]              |
| ENSMUSG000000003477 | Inmt       | 39.04553 | 14.9581  | 1.382643 | 0.010194 | protein_co indolethylamine N-methyltransferase [Source:MGI Symbol;Acc:MG       |
| ENSMUSG000000105504 | Gbp5       | 99.24071 | 34.21311 | 1.542633 | 0.010418 | protein_co guanylate binding protein 5 [Source:MGI Symbol;Acc:MGI:2429943      |
| ENSMUSG000000040856 | Dlk1       | 335.667  | 164.6729 | 1.02929  | 0.010473 | protein_co delta like non-canonical Notch ligand 1 [Source:MGI Symbol;Acc:M    |
| ENSMUSG000000024427 | Spry4      | 196.8471 | 370.2945 | -0.91259 | 0.010511 | protein_co sprouty RTK signaling antagonist 4 [Source:MGI Symbol;Acc:MGI:1:    |
| ENSMUSG000000056648 | Hoxb8      | 28.91652 | 2.267204 | 3.687411 | 0.011206 | protein_co homeobox B8 [Source:MGI Symbol;Acc:MGI:96189]                       |
| ENSMUSG000000045930 | Clec14a    | 92.16319 | 46.0174  | 0.999493 | 0.011685 | protein_co C-type lectin domain family 14, member a [Source:MGI Symbol;Acc     |
| ENSMUSG000000049580 | Tsku       | 73.08161 | 35.6873  | 1.032397 | 0.012068 | protein_co tsukushi, small leucine rich proteoglycan [Source:MGI Symbol;Acc:l  |
| ENSMUSG000000023272 | Creld2     | 347.9534 | 607.6087 | -0.80416 | 0.012395 | protein_co cysteine-rich with EGF-like domains 2 [Source:MGI Symbol;Acc:MG     |
| ENSMUSG000000028270 | Gbp2       | 114.3302 | 42.82822 | 1.418072 | 0.01268  | protein_co guanylate binding protein 2 [Source:MGI Symbol;Acc:MGI:102772]      |
| ENSMUSG000000027800 | Tm4sf1     | 302.7151 | 189.3882 | 0.675893 | 0.013079 | protein_co transmembrane 4 superfamily member 1 [Source:MGI Symbol;Acc         |
| ENSMUSG000000047230 | Cldn2      | 120.2221 | 52.52655 | 1.197328 | 0.013567 | protein_co claudin 2 [Source:MGI Symbol;Acc:MGI:1276110]                       |
| ENSMUSG000000044285 | Gm1821     | 273.2799 | 130.0052 | 1.074561 | 0.014738 | transcribed predicted gene 1821 [Source:MGI Symbol;Acc:MGI:3037679]            |
| ENSMUSG000000074817 | Papolb     | 1.692014 | 10.40468 | -2.59847 | 0.01542  | protein_co poly (A) polymerase beta (testis specific) [Source:MGI Symbol;Acc:l |

|                    |             |          |          |          |          |                                                                                                       |
|--------------------|-------------|----------|----------|----------|----------|-------------------------------------------------------------------------------------------------------|
| ENSMUSG00000039323 | Igfbp2      | 1353.389 | 674.9372 | 1.003916 | 0.015616 | protein_co insulin-like growth factor binding protein 2 [Source:MGI Symbol;Acc:MGI:1351490]           |
| ENSMUSG00000035711 | Dok3        | 251.0038 | 496.9964 | -0.98517 | 0.015642 | protein_co docking protein 3 [Source:MGI Symbol;Acc:MGI:1351490]                                      |
| ENSMUSG00000059201 | Lep         | 14.15607 | 1.065305 | 3.811329 | 0.015742 | protein_co leptin [Source:MGI Symbol;Acc:MGI:104663]                                                  |
| ENSMUSG00000054072 | Iigp1       | 75.35629 | 25.43153 | 1.571959 | 0.015839 | protein_co interferon inducible GTPase 1 [Source:MGI Symbol;Acc:MGI:19262]                            |
| ENSMUSG00000069588 | Gm11733     | 6.356638 | 0.282266 | 4.228586 | 0.016446 | protein_co predicted gene 11733 [Source:MGI Symbol;Acc:MGI:3650737]                                   |
| ENSMUSG00000088791 | Gm22542     | 0        | 4.903552 | -4.66816 | 0.016532 | snRNA predicted gene, 22542 [Source:MGI Symbol;Acc:MGI:5452319]                                       |
| ENSMUSG00000050926 | Dcaf12l2    | 21.60486 | 5.545008 | 1.94982  | 0.01708  | protein_co DDB1 and CUL4 associated factor 12-like 2 [Source:MGI Symbol;Acc:MGI:1351490]              |
| ENSMUSG00000020484 | Xbp1        | 1488.958 | 2584.361 | -0.79557 | 0.017189 | protein_co X-box binding protein 1 [Source:MGI Symbol;Acc:MGI:98970]                                  |
| ENSMUSG00000073421 | H2-Ab1      | 91.66292 | 35.4109  | 1.375558 | 0.017272 | protein_co histocompatibility 2, class II antigen A, beta 1 [Source:MGI Symbol;Acc:MGI:1351490]       |
| ENSMUSG00000041809 | Efhc1       | 65.73068 | 30.9154  | 1.094621 | 0.017608 | protein_co EF-hand domain (C-terminal) containing 1 [Source:MGI Symbol;Acc:MGI:1351490]               |
| ENSMUSG00000024610 | Cd74        | 260.7667 | 91.81485 | 1.506793 | 0.018037 | protein_co CD74 antigen (invariant polypeptide of major histocompatibility co                         |
| ENSMUSG00000032744 | Heyl        | 102.7886 | 53.72959 | 0.939556 | 0.018222 | protein_co hairy/enhancer-of-split related with YRPW motif-like [Source:MGI Symbol;Acc:MGI:1351490]   |
| ENSMUSG00000036198 | Arhgap36    | 51.08975 | 19.66305 | 1.387778 | 0.018231 | protein_co Rho GTPase activating protein 36 [Source:MGI Symbol;Acc:MGI:19262]                         |
| ENSMUSG00000062515 | Fabp4       | 40.51973 | 7.325505 | 2.491554 | 0.018301 | protein_co fatty acid binding protein 4, adipocyte [Source:MGI Symbol;Acc:MGI:1351490]                |
| ENSMUSG00000104093 | A330015K06l | 62.43283 | 32.66517 | 0.937698 | 0.019356 | antisense RIKEN cDNA A330015K06 gene [Source:MGI Symbol;Acc:MGI:2443]                                 |
| ENSMUSG00000038236 | Hoxa7       | 4.7949   | 0        | 4.788616 | 0.019619 | protein_co homeobox A7 [Source:MGI Symbol;Acc:MGI:96179]                                              |
| ENSMUSG00000046714 | Foxc2       | 91.70169 | 37.53652 | 1.289875 | 0.02004  | protein_co forkhead box C2 [Source:MGI Symbol;Acc:MGI:1347481]                                        |
| ENSMUSG00000109353 | Gm45183     | 0.350489 | 6.818868 | -4.19098 | 0.020135 | TEC predicted gene 45183 [Source:MGI Symbol;Acc:MGI:5753759]                                          |
| ENSMUSG00000036718 | Mical2      | 72.33612 | 34.55911 | 1.065906 | 0.020884 | protein_co MICAL-like 2 [Source:MGI Symbol;Acc:MGI:2444818]                                           |
| ENSMUSG00000079363 | Gbp4        | 168.238  | 42.07419 | 2.002804 | 0.021358 | protein_co guanylate binding protein 4 [Source:MGI Symbol;Acc:MGI:97072]                              |
| ENSMUSG00000024907 | Gal         | 60.96586 | 13.15626 | 2.210371 | 0.021518 | protein_co galanin [Source:MGI Symbol;Acc:MGI:95637]                                                  |
| ENSMUSG00000050211 | Pla2g4e     | 273.155  | 142.3008 | 0.941509 | 0.02155  | protein_co phospholipase A2, group IVE [Source:MGI Symbol;Acc:MGI:191914]                             |
| ENSMUSG00000035694 | Caps2       | 12.16692 | 2.680224 | 2.225112 | 0.021738 | protein_co calcyphosphine 2 [Source:MGI Symbol;Acc:MGI:2441980]                                       |
| ENSMUSG00000018822 | Sfrp5       | 130.7493 | 50.50822 | 1.373731 | 0.022064 | protein_co secreted frizzled-related sequence protein 5 [Source:MGI Symbol;Acc:MGI:1351490]           |
| ENSMUSG00000004341 | Gpx6        | 6.085335 | 0.311225 | 4.173374 | 0.022177 | protein_co glutathione peroxidase 6 [Source:MGI Symbol;Acc:MGI:1922762]                               |
| ENSMUSG00000083226 | Gm7831      | 7.674246 | 0.919633 | 3.042371 | 0.022184 | processed_ predicted gene 7831 [Source:MGI Symbol;Acc:MGI:3643841]                                    |
| ENSMUSG00000112035 | Gm49335     | 31.99032 | 116.3075 | -1.86009 | 0.022568 | lincRNA predicted gene, 49335 [Source:MGI Symbol;Acc:MGI:6121522]                                     |
| ENSMUSG00000036169 | Sostdc1     | 162.2524 | 58.68644 | 1.469894 | 0.022994 | protein_co sclerostin domain containing 1 [Source:MGI Symbol;Acc:MGI:1913]                            |
| ENSMUSG00000073409 | H2-Q6       | 127.0446 | 36.75027 | 1.791136 | 0.02321  | protein_co histocompatibility 2, Q region locus 6 [Source:MGI Symbol;Acc:MGI:1351490]                 |
| ENSMUSG00000003484 | Cyp4f18     | 16.10056 | 4.474739 | 1.855336 | 0.0233   | protein_co cytochrome P450, family 4, subfamily f, polypeptide 18 [Source:MGI Symbol;Acc:MGI:1351490] |
| ENSMUSG00000078853 | Igtp        | 136.6656 | 55.18068 | 1.309461 | 0.023415 | protein_co interferon gamma induced GTPase [Source:MGI Symbol;Acc:MGI:1351490]                        |
| ENSMUSG00000037086 | Prr32       | 53.31863 | 17.29055 | 1.626571 | 0.024519 | protein_co proline rich 32 [Source:MGI Symbol;Acc:MGI:1916050]                                        |
| ENSMUSG00000079737 | 3110001I22R | 20.95589 | 42.29849 | -1.01759 | 0.025076 | protein_co RIKEN cDNA 3110001I22 gene [Source:MGI Symbol;Acc:MGI:1913]                                |
| ENSMUSG00000038112 | AW551984    | 179.9094 | 98.81421 | 0.86624  | 0.025263 | protein_co expressed sequence AW551984 [Source:MGI Symbol;Acc:MGI:214]                                |

|                    |             |          |          |          |          |             |                                                                      |
|--------------------|-------------|----------|----------|----------|----------|-------------|----------------------------------------------------------------------|
| ENSMUSG00000106928 | Gm43860     | 29.43705 | 62.92885 | -1.0964  | 0.025678 | TEC         | predicted gene 43860 [Source:MGI Symbol;Acc:MGI:5663997]             |
| ENSMUSG00000023043 | Krt18       | 79.02818 | 28.81349 | 1.460584 | 0.025846 | protein_co  | keratin 18 [Source:MGI Symbol;Acc:MGI:96692]                         |
| ENSMUSG00000086794 | Gm11642     | 23.84465 | 9.58772  | 1.325453 | 0.026821 | processed_  | predicted gene 11642 [Source:MGI Symbol;Acc:MGI:3651889]             |
| ENSMUSG00000093865 | Lrit3       | 5.371688 | 0.355102 | 3.982925 | 0.027067 | protein_co  | leucine-rich repeat, immunoglobulin-like and transmembrane dom       |
| ENSMUSG00000089817 | Gm7162      | 18.47346 | 72.67781 | -1.96974 | 0.027223 | processed_  | predicted gene 7162 [Source:MGI Symbol;Acc:MGI:3645097]              |
| ENSMUSG00000023945 | Slc5a7      | 40.66311 | 12.85735 | 1.676166 | 0.027329 | protein_co  | solute carrier family 5 (choline transporter), member 7 [Source:MG   |
| ENSMUSG00000036594 | H2-Aa       | 84.25764 | 33.83811 | 1.319684 | 0.028162 | protein_co  | histocompatibility 2, class II antigen A, alpha [Source:MGI Symbol;/ |
| ENSMUSG00000031727 | Pmfbp1      | 20.01737 | 5.808268 | 1.802091 | 0.028894 | protein_co  | polyamine modulated factor 1 binding protein 1 [Source:MGI Symk      |
| ENSMUSG00000083332 | Gm7599      | 12.9705  | 3.79437  | 1.776363 | 0.028897 | processed_  | predicted gene 7599 [Source:MGI Symbol;Acc:MGI:3644309]              |
| ENSMUSG00000037921 | Ddx60       | 29.579   | 13.02786 | 1.189107 | 0.029481 | protein_co  | DEAD (Asp-Glu-Ala-Asp) box polypeptide 60 [Source:MGI Symbol;A       |
| ENSMUSG00000092574 | 2810047C21f | 5.082127 | 0.282266 | 3.913998 | 0.029757 | transcribed | RIKEN cDNA 2810047C21 gene 1 [Source:MGI Symbol;Acc:MGI:191          |
| ENSMUSG00000004105 | Angptl2     | 126.4996 | 73.48448 | 0.786366 | 0.030008 | protein_co  | angiopoietin-like 2 [Source:MGI Symbol;Acc:MGI:1347002]              |
| ENSMUSG00000035929 | H2-Q4       | 249.5752 | 98.48074 | 1.342761 | 0.030657 | protein_co  | histocompatibility 2, Q region locus 4 [Source:MGI Symbol;Acc:MG     |
| ENSMUSG00000064364 | mt-Th       | 159.9078 | 72.92021 | 1.134056 | 0.030692 | Mt_tRNA     | mitochondrially encoded tRNA histidine [Source:MGI Symbol;Acc:M      |
| ENSMUSG00000028820 | Sfpq        | 2476.42  | 3794.515 | -0.61566 | 0.030742 | protein_co  | splicing factor proline/glutamine rich (polypyrimidine tract binding |
| ENSMUSG00000105012 | Gm42813     | 6.918922 | 0.919633 | 2.894927 | 0.031    | lincRNA     | predicted gene 42813 [Source:MGI Symbol;Acc:MGI:5662950]             |
| ENSMUSG00000030218 | Mgp         | 589.8307 | 336.7813 | 0.80871  | 0.032012 | protein_co  | matrix Gla protein [Source:MGI Symbol;Acc:MGI:96976]                 |
| ENSMUSG00000002980 | Bcam        | 521.9116 | 318.5688 | 0.712538 | 0.03261  | protein_co  | basal cell adhesion molecule [Source:MGI Symbol;Acc:MGI:192994       |
| ENSMUSG00000020713 | Gh          | 4.958434 | 37.11621 | -2.89412 | 0.033466 | protein_co  | growth hormone [Source:MGI Symbol;Acc:MGI:95707]                     |
| ENSMUSG00000022613 | Miox        | 7.221648 | 0.282266 | 4.4211   | 0.034314 | protein_co  | myo-inositol oxygenase [Source:MGI Symbol;Acc:MGI:1891725]           |
| ENSMUSG00000068323 | Slc4a5      | 240.8517 | 97.94618 | 1.300381 | 0.034902 | protein_co  | solute carrier family 4, sodium bicarbonate cotransporter, member    |
| ENSMUSG00000023484 | Prph        | 116.7984 | 46.27716 | 1.336093 | 0.03491  | protein_co  | peripherin [Source:MGI Symbol;Acc:MGI:97774]                         |
| ENSMUSG00000108227 | 4933412L11f | 7.573972 | 0.710203 | 3.505799 | 0.035109 | TEC         | RIKEN cDNA 4933412L11 gene [Source:MGI Symbol;Acc:MGI:1921.          |
| ENSMUSG00000074925 | Ptar1       | 30.62112 | 86.38108 | -1.49424 | 0.035707 | protein_co  | protein prenyltransferase alpha subunit repeat containing 1 [Sourc   |
| ENSMUSG00000038567 | Cyp24a1     | 3.933643 | 0        | 4.496664 | 0.035884 | protein_co  | cytochrome P450, family 24, subfamily a, polypeptide 1 [Source:M     |
| ENSMUSG00000065037 | Rn7sk       | 40.52157 | 76.96611 | -0.92836 | 0.036162 | misc_RNA    | RNA, 7SK, nuclear [Source:MGI Symbol;Acc:MGI:103186]                 |
| ENSMUSG00000026979 | Psd4        | 6.707127 | 19.58435 | -1.55613 | 0.036183 | protein_co  | pleckstrin and Sec7 domain containing 4 [Source:MGI Symbol;Acc:I     |
| ENSMUSG00000022878 | Adipoq      | 8.487242 | 1.065305 | 3.082978 | 0.036186 | protein_co  | adiponectin, C1Q and collagen domain containing [Source:MGI Syn      |
| ENSMUSG00000031344 | Gabrq       | 72.90407 | 33.81501 | 1.115391 | 0.036234 | protein_co  | gamma-aminobutyric acid (GABA) A receptor, subunit theta [Sourc      |
| ENSMUSG00000027274 | Mkks        | 175.5037 | 270.5584 | -0.62571 | 0.036243 | protein_co  | McKusick-Kaufman syndrome [Source:MGI Symbol;Acc:MGI:18918           |
| ENSMUSG00000038537 | Mc3r        | 6.559517 | 0.948593 | 2.798997 | 0.03672  | protein_co  | melanocortin 3 receptor [Source:MGI Symbol;Acc:MGI:96929]            |
| ENSMUSG00000107698 | Gm44430     | 9.024686 | 22.83582 | -1.34276 | 0.036885 | TEC         | predicted gene, 44430 [Source:MGI Symbol;Acc:MGI:5690822]            |
| ENSMUSG00000103952 | Gm37268     | 1.368698 | 7.778289 | -2.48616 | 0.037183 | TEC         | predicted gene, 37268 [Source:MGI Symbol;Acc:MGI:5610496]            |
| ENSMUSG00000111013 | Gm32468     | 8.79789  | 1.897185 | 2.215979 | 0.037288 | lincRNA     | predicted gene, 32468 [Source:MGI Symbol;Acc:MGI:5591627]            |

|                     |             |          |          |          |          |                                                                                                                           |
|---------------------|-------------|----------|----------|----------|----------|---------------------------------------------------------------------------------------------------------------------------|
| ENSMUSG00000009734  | Pou6f2      | 19.34313 | 5.872026 | 1.7181   | 0.037436 | protein_co POU domain, class 6, transcription factor 2 [Source:MGI Symbol;Acc:MGI:1927642]                                |
| ENSMUSG000000031738 | Irx6        | 16.07105 | 4.510413 | 1.816742 | 0.03805  | protein_co Iroquois homeobox 6 [Source:MGI Symbol;Acc:MGI:1927642]                                                        |
| ENSMUSG000000032454 | Rbp2        | 6.553431 | 0.875757 | 2.845241 | 0.038496 | protein_co retinol binding protein 2, cellular [Source:MGI Symbol;Acc:MGI:9781276109]                                     |
| ENSMUSG000000022512 | Cldn1       | 83.56159 | 33.3321  | 1.328759 | 0.038607 | protein_co claudin 1 [Source:MGI Symbol;Acc:MGI:1276109]                                                                  |
| ENSMUSG000000022056 | Adam7       | 6.281631 | 0        | 5.176216 | 0.038624 | protein_co a disintegrin and metallopeptidase domain 7 [Source:MGI Symbol;Acc:MGI:3040669]                                |
| ENSMUSG000000079065 | BC005561    | 77.76681 | 164.7106 | -1.08345 | 0.038679 | protein_co cDNA sequence BC005561 [Source:MGI Symbol;Acc:MGI:3040669]                                                     |
| ENSMUSG000000029219 | Slc10a4     | 45.05643 | 16.96207 | 1.42105  | 0.03947  | protein_co solute carrier family 10 (sodium/bile acid cotransporter family), member 4 [Source:MGI Symbol;Acc:MGI:2386621] |
| ENSMUSG000000074643 | Cpne1       | 2.483426 | 10.68198 | -2.11203 | 0.039609 | protein_co copine I [Source:MGI Symbol;Acc:MGI:2386621]                                                                   |
| ENSMUSG000000101450 | Gm28941     | 4.918593 | 19.26906 | -1.96755 | 0.04019  | sense_intronic predicted gene 28941 [Source:MGI Symbol;Acc:MGI:5579647]                                                   |
| ENSMUSG000000097336 | Fendrr      | 38.51042 | 19.21112 | 1.005799 | 0.040324 | processed_Foxf1 adjacent non-coding developmental regulatory RNA [Source:MGI Symbol;Acc:MGI:2151886]                      |
| ENSMUSG000000021032 | Ngb         | 118.7104 | 57.97088 | 1.033555 | 0.040772 | protein_co neuroglobin [Source:MGI Symbol;Acc:MGI:2151886]                                                                |
| ENSMUSG000000092528 | Nlrp1c-ps   | 3.528808 | 0        | 4.341517 | 0.041033 | transcribed NLR family, pyrin domain containing 1C, pseudogene [Source:MGI Symbol;Acc:MGI:2681879]                        |
| ENSMUSG000000034918 | Cdhr2       | 14.75295 | 4.611333 | 1.663499 | 0.041099 | protein_co cadherin-related family member 2 [Source:MGI Symbol;Acc:MGI:2681879]                                           |
| ENSMUSG000000030307 | Slc6a11     | 2617.63  | 1706.925 | 0.617078 | 0.04112  | protein_co solute carrier family 6 (neurotransmitter transporter, GABA), member 11 [Source:MGI Symbol;Acc:MGI:88382]      |
| ENSMUSG000000026579 | F5          | 195.0959 | 83.66431 | 1.22329  | 0.041229 | protein_co coagulation factor V [Source:MGI Symbol;Acc:MGI:88382]                                                         |
| ENSMUSG000000103800 | Pcdha8      | 5.861369 | 19.74172 | -1.74653 | 0.0415   | protein_co protocadherin alpha 8 [Source:MGI Symbol;Acc:MGI:2681879]                                                      |
| ENSMUSG000000097912 | 6330403N20  | 7.206149 | 1.259818 | 2.522333 | 0.041882 | lincRNA RIKEN cDNA 6330403N20 gene [Source:MGI Symbol;Acc:MGI:1917443]                                                    |
| ENSMUSG000000056174 | Col8a2      | 245.2786 | 120.0294 | 1.032695 | 0.042012 | protein_co collagen, type VIII, alpha 2 [Source:MGI Symbol;Acc:MGI:88464]                                                 |
| ENSMUSG000000026686 | Lmx1a       | 42.9324  | 15.95468 | 1.43944  | 0.042195 | protein_co LIM homeobox transcription factor 1 alpha [Source:MGI Symbol;Acc:MGI:3641792]                                  |
| ENSMUSG000000079436 | Kcnj13      | 87.17851 | 42.41496 | 1.044615 | 0.042346 | protein_co potassium inwardly-rectifying channel, subfamily J, member 13 [Source:MGI Symbol;Acc:MGI:24431]                |
| ENSMUSG000000098202 | B830012L14F | 1.74636  | 9.212737 | -2.39314 | 0.042356 | lincRNA RIKEN cDNA B830012L14 gene [Source:MGI Symbol;Acc:MGI:24431]                                                      |
| ENSMUSG000000059430 | Actg2       | 9.239737 | 1.158022 | 2.948644 | 0.042403 | protein_co actin, gamma 2, smooth muscle, enteric [Source:MGI Symbol;Acc:MGI:6096474]                                     |
| ENSMUSG000000044951 | Mylk4       | 7.111962 | 1.230858 | 2.510292 | 0.042438 | protein_co myosin light chain kinase family, member 4 [Source:MGI Symbol;Acc:MGI:3641792]                                 |
| ENSMUSG000000042857 | Gm9776      | 86.44002 | 50.41025 | 0.777906 | 0.042454 | bidirection predicted gene 9776 [Source:MGI Symbol;Acc:MGI:3641792]                                                       |
| ENSMUSG000000060586 | H2-Eb1      | 91.76736 | 46.87739 | 0.972548 | 0.043614 | protein_co histocompatibility 2, class II antigen E beta [Source:MGI Symbol;Acc:MGI:192166]                               |
| ENSMUSG000000021187 | Tc2n        | 20.51447 | 6.517596 | 1.66599  | 0.04372  | protein_co tandem C2 domains, nuclear [Source:MGI Symbol;Acc:MGI:192166]                                                  |
| ENSMUSG000000106430 | Gm42460     | 7.24457  | 0.62245  | 3.526744 | 0.044281 | TEC predicted gene 42460 [Source:MGI Symbol;Acc:MGI:5662597]                                                              |
| ENSMUSG000000083826 | Gm13039     | 0        | 3.555981 | -4.20591 | 0.044726 | processed_predicted gene 13039 [Source:MGI Symbol;Acc:MGI:3649997]                                                        |
| ENSMUSG000000044551 | 9930012K11F | 52.19181 | 27.20704 | 0.948337 | 0.044941 | protein_co RIKEN cDNA 9930012K11 gene [Source:MGI Symbol;Acc:MGI:21450]                                                   |
| ENSMUSG000000116835 | AC165079.1  | 9.293656 | 39.14502 | -2.07363 | 0.045029 | processed_ribosomal protein L15 (Rpl15), pseudogene                                                                       |
| ENSMUSG000000019906 | Lin7a       | 295.0906 | 734.5446 | -1.31549 | 0.045375 | protein_co lin-7 homolog A (C. elegans) [Source:MGI Symbol;Acc:MGI:213560]                                                |
| ENSMUSG000000112947 | Gm47493     | 0.673805 | 6.323958 | -3.1919  | 0.045504 | TEC predicted gene, 47493 [Source:MGI Symbol;Acc:MGI:6096474]                                                             |
| ENSMUSG000000054178 | Gm9938      | 50.19048 | 125.0312 | -1.31583 | 0.045604 | protein_co predicted gene 9938 [Source:MGI Symbol;Acc:MGI:3641836]                                                        |
| ENSMUSG000000108660 | Gm21284     | 3.492719 | 0        | 4.32882  | 0.045669 | antisense predicted gene, 21284 [Source:MGI Symbol;Acc:MGI:5434639]                                                       |



|                    |          |          |          |          |          |                                                                              |
|--------------------|----------|----------|----------|----------|----------|------------------------------------------------------------------------------|
| ENSMUSG00000030278 | Cidec    | 9.025183 | 1.332653 | 2.801331 | 0.046205 | protein_co cell death-inducing DFFA-like effector c [Source:MGI Symbol;Acc:M |
| ENSMUSG00000059463 | Spag11b  | 8.411738 | 0        | 5.597373 | 0.046402 | protein_co sperm associated antigen 11B [Source:MGI Symbol;Acc:MGI:36471     |
| ENSMUSG00000076609 | Igkc     | 21.51159 | 8.377619 | 1.353005 | 0.046948 | IG_C_gene immunoglobulin kappa constant [Source:MGI Symbol;Acc:MGI:964       |
| ENSMUSG00000069874 | Irgm2    | 128.498  | 60.02048 | 1.100231 | 0.047058 | protein_co immunity-related GTPase family M member 2 [Source:MGI Symbol      |
| ENSMUSG00000005892 | Trh      | 29.44963 | 7.35444  | 1.9919   | 0.0474   | protein_co thyrotropin releasing hormone [Source:MGI Symbol;Acc:MGI:9882     |
| ENSMUSG00000053375 | Atp6v1e2 | 4.154353 | 0.311225 | 3.618754 | 0.047654 | protein_co ATPase, H+ transporting, lysosomal V1 subunit E2 [Source:MGI Syn  |
| ENSMUSG00000036449 | Lcn8     | 10.40598 | 0.710203 | 3.944444 | 0.047817 | protein_co lipocalin 8 [Source:MGI Symbol;Acc:MGI:2135945]                   |
| ENSMUSG00000029322 | Plac8    | 3.501635 | 0        | 4.331769 | 0.048511 | protein_co placenta-specific 8 [Source:MGI Symbol;Acc:MGI:2445289]           |
| ENSMUSG00000097253 | Gm26770  | 20.29709 | 8.066394 | 1.325062 | 0.048737 | antisense predicted gene, 26770 [Source:MGI Symbol;Acc:MGI:5477264]          |
| ENSMUSG00000048772 | Tmem53   | 53.72588 | 28.34428 | 0.920663 | 0.049225 | protein_co transmembrane protein 53 [Source:MGI Symbol;Acc:MGI:1916027       |
| ENSMUSG00000029817 | Tra2a    | 1626.328 | 2241.118 | -0.46247 | 0.049555 | protein_co transformer 2 alpha [Source:MGI Symbol;Acc:MGI:1933972]           |
| ENSMUSG00000066357 | Wdr6     | 2916.398 | 2001.764 | 0.542877 | 0.04968  | protein_co WD repeat domain 6 [Source:MGI Symbol;Acc:MGI:1930140]            |
